## 1 Title

2 Cross-species functional diversity within the PIN auxin efflux protein family

## 3 Authors

4 Devin Lee O'Connor<sup>1,^</sup>, Mon Mandy Hsia<sup>2</sup>, John Vogel<sup>3,4</sup>, Ottoline Leyser<sup>1</sup>.

## 5 Affiliations

6 <sup>1</sup>Sainsbury Laboratory University of Cambridge, Cambridge, UK.

7 <sup>2</sup>USDA-ARS Western Regional Research Center, Albany, CA.

8 <sup>3</sup>U.S. Department of Energy Joint Genome Institute, Walnut Creek, CA.

9 <sup>4</sup>Department of Plant and Microbial Biology, University of California, Berkeley, CA.

10 <sup>^</sup>Author for Correspondence: Devin Lee O'Connor [devin.oconnor@slcu.cam.ac.uk](mailto:devin.oconnor@slcu.cam.ac.uk)

11

## 12 Abstract

13 In plants, directional transport of the hormone auxin creates auxin concentration  
14 maxima and paths of transport that provide positional, polarity, and growth regulatory  
15 cues throughout development. In *Arabidopsis thaliana*, the polar-localized auxin  
16 transport protein PIN-FORMED1 (AtPIN1) is required to coordinate development  
17 during flowering. However, Arabidopsis has a derived PIN family structure; the  
18 majority of flowering plants have retained a clade of PIN proteins phylogenetically  
19 sister to PIN1, the Sister-of-PIN1 clade (SoPIN1), which has been lost in the  
20 Brassicaceae, including Arabidopsis. Based on PIN localization in the grasses  
21 *Brachypodium distachyon* and *Zea mays*, which have both SoPIN1 and PIN1 clades,  
22 we previously proposed that the organ initiation and vein patterning roles attributed to  
23 AtPIN1 were shared between the SoPIN1 and PIN1 clades in grasses. Here we show  
24 that *sopin1* and *pin1b* mutants have distinct phenotypes in *Brachypodium* and thus  
25 the two clades are not functionally equivalent. *sopin1* mutants have severe organ  
26 initiation defects similar to Arabidopsis *atpin1* mutants, while *pin1b* mutants initiate  
27 organs normally but have increased stem elongation. Heterologous expression of  
28 *Brachypodium* PIN1b and SoPIN1 in Arabidopsis *atpin1* mutants provides further  
29 evidence for functional distinction between the two clades. SoPIN1 but not PIN1b can  
30 complement null *atpin1* mutants, while both SoPIN1 and PIN1b can complement an  
31 *atpin1* missense allele with a single amino acid change. The different localization  
32 behaviors of SoPIN1 and PIN1b when heterologously expressed in Arabidopsis  
33 provide insight into how PIN accumulation at the plasma membrane, tissue-level  
34 protein accumulation, transport activity, and interaction, all contribute to the  
35 polarization dynamics that distinguish PIN family members. Combined, these results  
36 suggest that the PIN polarization and trafficking behaviors required for organ initiation  
37 differ from those required for other PIN functions in the shoot, and that in most  
38 flowering plants these functions are split between two PIN clades.

## 39 Introduction

40 The plant hormone auxin is an essential mobile signal controlling growth and  
41 patterning throughout plant development (Leyser, 2010). Auxin can passively enter  
42 cells, triggering a vast array of downstream signaling events (Wang and Estelle, 2014),  
43 but it cannot easily exit the cell without active transport (Raven, 1975; Rubery and  
44 Sheldrake, 1974). As a result, directional efflux mediated by the polar-localized PIN-  
45 FORMED (PIN) efflux carriers can organize auxin accumulation patterns, creating  
46 concentration maxima and paths of transport that regulate growth, position organs,  
47 and pattern tissues (Adamowski and Friml, 2015). Because auxin itself feeds back to  
48 regulate PIN-mediated transport both transcriptionally and post-transcriptionally  
49 (Leyser, 2006), the transport system shows remarkable robustness and plasticity. For  
50 example, within the PIN family compensatory changes in PIN abundance can mitigate  
51 PIN loss-of-function mutant phenotypes (Blilou et al., 2005; Paponov et al., 2005;  
52 Vieten et al., 2005), environmental inputs can trigger tissue-level changes in PIN  
53 abundance and polarity leading to altered plant growth (Habets and Offringa, 2014),  
54 and auxin transport paths can be reorganized in response to injury (Xu et al., 2006),  
55 or spontaneously in tissue culture (Gordon et al., 2007). The self-organizing properties  
56 of the auxin transport system thus gives this patterning mechanism extraordinary  
57 versatility, and allows it to coordinate local and long range communication in the plant.

58 The correct initiation and positioning of organs (leaves, flowers, stems) in the growing  
59 tip, or shoot apical meristem, of *Arabidopsis thaliana* (*Arabidopsis*) plants requires the  
60 action of the PIN-FORMED1 (AtPIN1) auxin efflux carrier (Okada, 1991). AtPIN1 is  
61 targeted to the plasma membrane and polarized in cells (Gälweiler et al., 1998). In the  
62 meristem epidermis, polarization of AtPIN1 in neighboring cells converges around the  
63 initiation sites of new organs, suggesting that polarized AtPIN1 concentrates auxin into  
64 local maxima causing organ initiation (Benková et al., 2003; Heisler et al., 2005;  
65 Reinhardt et al., 2003). Accordingly, in *atpin1* loss-of-function mutants, or if auxin  
66 transport is pharmacologically inhibited, organ initiation is aborted, but it can be  
67 rescued with local auxin application to the meristem flank (Reinhardt et al., 2003;  
68 Reinhardt et al., 2000). Organ initiation in *atpin1* mutants can also be rescued with  
69 epidermal-specific AtPIN1 expression (Bilsborough et al., 2011) and reducing AtPIN1  
70 function specifically in the epidermis compromises organ positioning and initiation  
71 (Kierzkowski et al., 2013), demonstrating the importance of convergent AtPIN1  
72 polarization in the epidermis during organ formation.

73 The recurrent formation of AtPIN1 convergence points surrounding auxin maxima in  
74 the meristem epidermis has been the focus of several computational models that  
75 attempt to explain how auxin feeds back on its own transport via AtPIN1 to polarize  
76 toward auxin maxima and control organ spacing (Abley et al., 2016; Bayer et al., 2009;  
77 Jönsson et al., 2006; Smith, 2006; Stoma et al., 2008). However, AtPIN1 is also  
78 expressed during the patterning of the vascular strands formed coincident with organ  
79 positioning, and in these sub-epidermal cells AtPIN1 is polarized basally, away from  
80 the presumed auxin maxima, suggesting that the control of AtPIN1 polarity with  
81 respect to auxin is not consistent across tissues (Bayer et al., 2009).

82 Indeed, AtPIN1 is also expressed during patterning of leaf veins, and in mature tissues  
83 (Gälweiler et al., 1998; Scarpella et al., 2006). During the vegetative phase, AtPIN1 is  
84 not required for organ initiation but the organs that do form are misplaced and have  
85 severe morphological and vascular defects, suggesting an important role for AtPIN1

86 in post-initiation morphogenesis and vein patterning in leaves, consistent with the  
87 vascular patterning defects observed upon pharmacological inhibition of auxin  
88 transport (Guenot et al., 2012; Sawchuk et al., 2013; Verna et al., 2015). Furthermore,  
89 in mature tissues, AtPIN1 is expressed in vascular-associated cells and is required for  
90 efficient long distance transport of auxin down the shoot in the polar auxin transport  
91 stream, and this has been proposed to play an important role in the regulation of shoot  
92 branching (Bennett et al., 2016; Bennett et al., 2006; Gälweiler et al., 1998; Shinohara  
93 et al., 2013). Mutations in other PIN family members in combination with AtPIN1  
94 mutants suggest further functions in embryo development, root development and  
95 during plant growth responses to light and gravity (Leyser, 2005). Unfortunately, the  
96 myriad roles for AtPIN1 during plant development are genetically obscured by the  
97 severity of *atpin1* mutant organ initiation defects.

98 We previously showed that all sampled flowering plants outside of the Brassicacea  
99 family have a clade of PIN proteins sister to the PIN1 clade (Sister-of-PIN1 or SoPIN1),  
100 while Arabidopsis and other Brassicacea species have lost this clade (O'Connor et al.,  
101 2014). During organ initiation in the grass *Brachypodium distachyon* (Brachypodium)  
102 SoPIN1 is highly expressed in the epidermis, polarizes towards presumed auxin  
103 maxima, and forms convergent polarization patterns during the formation of new  
104 organs, suggesting a role in creating the auxin maxima required for organ initiation. In  
105 contrast, the PIN1 clade members in Brachypodium, PIN1a and PIN1b, are not highly  
106 expressed in the epidermis, orient away from presumed auxin maxima, and are  
107 primarily expressed during patterning in the sub-epidermal tissues. Thus, the  
108 combined expression domains and polarization behaviors of SoPIN1, PIN1a, and  
109 PIN1b in Brachypodium largely recapitulate those observed for AtPIN1 in Arabidopsis.

110 The localization and polarization of the Brachypodium SoPIN1 and PIN1 clades can  
111 be modeled with two different polarization modes with respect to auxin; SoPIN1  
112 polarizes “up-the-gradient”, towards the neighboring cell with the highest auxin  
113 concentration, while PIN1a and PIN1b polarize “with-the-flux”, accumulating in the  
114 membrane with the highest auxin flux (O'Connor et al., 2014). Both polarization modes  
115 were previously applied to AtPIN1 in order to capture the switch in polarity observed  
116 during organ initiation and vein patterning, first orienting toward auxin maxima during  
117 convergence point formation, then orienting away from maxima during vein patterning  
118 below the epidermis (Bayer et al., 2009). These localization and modeling results  
119 suggest that in most angiosperm species the organ placement and vascular patterning  
120 functions attributed to AtPIN1 in *Arabidopsis* are split between the PIN1 and SoPIN1  
121 clades, and that these two clades have different polarization properties with respect to  
122 auxin.

123 Here we present the functional analysis of both SoPIN1 and PIN1 protein clade  
124 members in Brachypodium, a species with the canonical two-clade family structure.  
125 We show that SoPIN1 and PIN1b have different functions during Brachypodium  
126 development, with SoPIN1 being required for organ initiation during the flowering  
127 phase, and PIN1b regulating stem elongation. Using heterologous expression in  
128 Arabidopsis, we show that the two proteins have different accumulation, polarization  
129 and transport behaviors that result in different functional properties independent of  
130 transcriptional context. These results suggest that the Arabidopsis AtPIN1 protein  
131 represents an example of an evolutionary phenomenon the opposite of  
132 subfunctionalisation in which protein functions are amalgamated into a single protein  
133 rather than diversified amongst paralogs. AtPIN1 has a repertoire of roles, and

134 associated polarization behaviors that are distributed among several clades of PIN  
135 proteins in most flowering plants.

## 136 **Results**

### 137 **SoPIN1 and PIN1b have different functions in Brachypodium**

138 During organ formation in the Brachypodium shoot, both SoPIN1 and PIN1b  
139 expression precede PIN1a, which only accumulates significantly at the site of midvein  
140 formation after the organ begins to grow. In the earliest stages of initiation, prior to the  
141 periclinal cell divisions that are the hallmark of morphogenesis, SoPIN1 forms  
142 convergent polarization patterns around the presumed auxin maxima in the meristem  
143 epidermis, while PIN1b is expressed internally and orients away from the maxima  
144 (O'Connor et al., 2014). Because of their early expression and opposing polarization  
145 patterns, we focused on characterizing SoPIN1 and PIN1b as representatives of the  
146 SoPIN1 and PIN1 clades.

147 As a first step towards understanding the functional differences between the SoPIN1  
148 and PIN1 clades, we targeted Brachypodium SoPIN1 and PIN1b with CRISPR and  
149 recovered loss-of-function mutants in both genes (see methods). Both *sopin1-1* and  
150 *pin1b-1* mutants have single base-pair lesions that result in frame-shifts and  
151 premature stop codons (Figure 1A). *sopin1-1* mutants show severe organ initiation  
152 defects in the inflorescence remarkably similar to loss-of-function *atpin1* mutants in  
153 *Arabidopsis* (Figure 1B-C, Figure 1 – supplement 1)(Okada, 1991). The indeterminate  
154 flowering shoots of the Brachypodium inflorescence, called spikelets (Figure 1B,  
155 inset), often fail to initiate in *sopin1-1* despite sometimes clear definition of node vs  
156 internode tissue (n, and i, in Figure 1C). When spikelets do form, the spikelet  
157 meristems are often devoid of new organs (Arrows in Figure 1C inset).

158 In wildtype spikelet meristems, SoPIN1 convergence point formation is coincident with  
159 a decrease in the nuclear auxin response reporter protein DII-Venus (Brunoud et al.,  
160 2012) (DII) (Figure 1E), which functions in Brachypodium and is degraded in the  
161 presence of auxin in spikelets (Figure 1 - supplement 2). In *sopin1-1* meristems DII  
162 accumulation is uniformly high for long stretches of the epidermis, and the patterned  
163 reduction of DII both in the meristem epidermis and internally fails to occur, suggesting  
164 a failure to organize auxin maxima (Figure 1F arrow).

165 In contrast to the severe defects of *sopin1-1*, organ initiation in *pin1b-1* mutants is  
166 unaffected (Figure 1D). However, *pin1b-1* mutants show minor shoot twisting and  
167 increased internode (stem tissue) length, especially in the basal few internodes  
168 (Figure 1G, 1H). The longer internodes of *pin1b-1* lead to an overall increase in plant  
169 height (Figure 1H). The internode defects of *pin1b-1* are consistent with the abundant  
170 PIN1b expression observed in wildtype stem tissue (Figure 1I). The difference in  
171 phenotypes between *sopin1-1* and *pin1b-1* Brachypodium mutants suggests a  
172 functional distinction between the SoPIN1 and PIN1 clades, and reveals that while  
173 PIN1b is expendable for organ initiation, it is involved in the regulation of internode  
174 growth.

175



## 176 **SoPIN1 and PIN1b accumulate differently in Arabidopsis**

177 The difference in the *sopin1-1* and *pin1b-1* phenotypes in *Brachypodium* may be due  
178 to their different expression patterns and not necessarily to differences in polarization  
179 behavior as previously hypothesized (O'Connor et al., 2014). In order to explore what  
180 functional differences exist between the proteins themselves, we expressed both  
181 *Brachypodium* proteins in wildtype (Columbia, Col-0) *Arabidopsis* under the control of  
182 a 3.5kb *Arabidopsis PIN1* promoter fragment known to drive PIN1 expression  
183 sufficient to complement *pin1* mutants (*proAtPIN1*) (Heisler et al., 2005). Remarkably,  
184 despite the loss of SoPIN1 from *Arabidopsis*, *Brachypodium* SoPIN1 created clear  
185 convergent polarization patterns around the sites of organ initiation in inflorescence  
186 meristems (Figure 2I asterisk, 25 of 27 meristems from 4 independent transgenic  
187 events). SoPIN1 protein abundance was highest in the meristem epidermis and  
188 SoPIN1 convergence points were most clearly observed surrounding I2 and I1  
189 primordia (Figure 2A). Immediately below the apex, SoPIN1 accumulated in an ill-  
190 defined ring shape within which the vascular bundles will form (Figure 2J, 15 of 23  
191 meristems from 4 independent events).

192 In contrast, significant PIN1b accumulation was absent from the meristem epidermis  
193 in 19 of 29 meristems from 7 independent transgenic events. In the few meristems  
194 where PIN1b was significantly expressed in the epidermis, it did not show clear  
195 convergent polarization patterns, and its polarity was often unclear (Figure 2B). Within  
196 initiating organs PIN1b often localized to punctate vesicular bodies inside cells not the  
197 cell membrane (Figure 2B arrow). The PIN1b expression level remained low just below  
198 the meristem apex, but in contrast to SoPIN1, PIN1b formed defined domains around  
199 the presumptive developing vascular bundles (Figure 2L). The lack of PIN1b protein  
200 in the meristem epidermis was not due to silencing of the transgene in these lines  
201 because we observed abundant PIN1b protein in the developing vasculature below  
202 the apex, even in plants where the meristem had no epidermal expression (Figure 2D)  
203 (8 samples from 4 events). In the same tissues SoPIN1 accumulated in both the  
204 vasculature and the epidermis (Figure 2C) (5 samples from 2 events).

205 In order to determine whether there were also tissue-level differences in protein  
206 accumulation in mature tissues, we imaged SoPIN1 and PIN1b in the basal internode.  
207 Here, AtPIN1 normally accumulates in a highly polar manner in the root-ward plasma  
208 membranes of cambium (c) and xylem parenchyma (xp) tissues of the vasculature  
209 (Bennett et al., 2016; Gälweiler et al., 1998). PIN1b accumulated in a similar pattern  
210 to AtPIN1 (Figure 2F, 2H. 10 samples from 5 independent transgenic events). In  
211 contrast, in addition to accumulating in the cambium and xylem parenchyma, SoPIN1  
212 accumulated in the central pith tissue (p) (Figure 2E, 2G. 15 samples from 4  
213 independent transgenic events). AtPIN1 is not normally observed in the pith (Bennett  
214 et al., 2016; Gälweiler et al., 1998). In the basal internode both proteins showed the  
215 characteristic AtPIN1 root-ward polarization pattern regardless of tissue-level  
216 abundance (Figure 2K, 2M).

217 Taken together, these results show that even under the same transcriptional control  
218 SoPIN1 and PIN1b show distinct tissue-level accumulation patterns in *Arabidopsis*.  
219 While the overall behavior of the two *Brachypodium* proteins is similar to AtPIN1 in  
220 many tissues, there are behaviors unique to each *Brachypodium* PIN even under the  
221 AtPIN1 promoter. PIN1b fails to accumulate in the epidermal tissues where AtPIN1  
222 and SoPIN1 remain high, whereas SoPIN1 accumulates in the pith tissue where

223 AtPIN1 and PIN1b do not. The convergent polarization patterns of SoPIN1 and the  
224 vascular accumulation of PIN1b in Arabidopsis are remarkably similar to their native  
225 behaviors in *Brachypodium* (O'Connor et al., 2014).

226

## 227 **SoPIN1 but not PIN1b can restore organ initiation and bulk auxin** 228 **transport in AtPIN1 null mutants**

229 To determine whether the observed differences in SoPIN1 and PIN1b polarization and  
230 accumulation have functional consequences in Arabidopsis, we used the *proAtPIN1*  
231 driven SoPIN1 and PIN1b constructs to complement the Arabidopsis *pin1-613* mutant  
232 (also known as *pin1-7*). The *pin1-613* allele is a putative null T-DNA insertion mutant  
233 with severe organ initiation defects in the inflorescence (Bennett et al., 2006; Smith,  
234 2006; Zourelidou et al., 2014). Given that epidermal PIN1 function is important for  
235 organ initiation (Bilsborough et al., 2011; Kierzkowski et al., 2013), as expected only  
236 SoPIN1 was able to complement the *pin1-613* mutation and mediate organ initiation  
237 (Figure 3A) (3 out of 6 independent transgenic events showed complementation).  
238 However, phenotypic complementation of *pin1-613* by SoPIN1 was incomplete, and  
239 mature plants showed a variety of phenotypic defects (Figure 3A, Figure 3 -  
240 supplement 1). Most notably, each flower produced more sepals and petals than wild-  
241 type, but almost no stamens (Figure 3B, 3C, Figure 3 - supplement 2). SoPIN1  
242 complemented *pin1-613* plants were thus sterile. We wondered if these phenotypes  
243 could be explained if SoPIN1 had poor auxin transport function in Arabidopsis.  
244 However, SoPIN1 restored wild-type levels of bulk auxin transport to *pin1-613* basal  
245 internodes (Figure 3D). Thus SoPIN1 is at least in part functionally capable of initiating  
246 organs and mediating root-ward auxin transport in the stem, but it is not functionally  
247 identical to AtPIN1 under the same promoter.

248 In SoPIN1 complemented *pin1-613* mutants, SoPIN1 accumulation increased in the  
249 meristem epidermis relative to wild-type or heterozygous plants, but the pronounced  
250 convergent polarization patterns observed in the WT background were less clear  
251 (Figure 4A, Figure 4 - supplement 1) (16 of 16 meristems). SoPIN1 complemented  
252 meristems showed a variety of phyllotactic defects and had highly variable  
253 morphologies (Figure 4 – supplement 1) (16 of 16 meristems). Similar to the pattern  
254 observed in the wild-type background, sub-epidermal SoPIN1 in *pin1-613* mutants  
255 accumulated in a loosely defined ring within which individual vein traces were difficult  
256 to discern (Figure 4I) (13 of 16 meristems). In the mature tissues, SoPIN1 accumulated  
257 in the epidermis, vasculature, and mature pith tissues similar to the wild-type  
258 background (Figure 4C, 4E, 4G).

259 In contrast to SoPIN1, PIN1b-expressing *pin1-613* plants had pin-formed  
260 inflorescences that were indistinguishable from *pin1-613* alone (Figure 3A) (all 7  
261 events failed to complement). The lack of complementation mediated by PIN1b was  
262 not caused by silencing or low expression level because abundant PIN1b signal was  
263 observed in *pin1-613* meristems (23 of 26 *pin1-613* meristems from 7 independent  
264 events). In most PIN1b expressing *pin1-613* samples, expression increased in the  
265 epidermis relative to wildtype, forming a ring-shaped domain around the meristem  
266 apex (Figure 4B, 4D arrow, Figure 4 - supplement 2) (14 of 19 meristem apices from  
267 6 independent events). Unlike in the wildtype background, PIN1b in the epidermis of  
268 *pin1-613* meristems was more consistently targeted to the membrane and polar

269 (Figure 4K). However, even with this elevated polar expression in the meristem  
270 epidermis, PIN1b was unable to mediate organ initiation. Below the apex, PIN1b was  
271 polarized root-ward in *pin1-613* meristems (Figure 4J), forming defined traces  
272 associated with the vasculature (Figure 4F, 4L). In the basal stem of *pin1-613* mutants  
273 PIN1b accumulated in a pattern similar to wild-type, although the arrangement of  
274 vascular bundles was irregular (Figure 4H). Remarkably, despite clear polar PIN1b  
275 expression in *pin1-613* mutant stems (Figure 4M), PIN1b was unable to rescue bulk  
276 auxin transport in this tissue (Figure 3D).

277 Although PIN1b was incapable of supporting organ formation or mediating bulk  
278 transport in *pin1-613*, when an auxin maximum was created artificially by addition of  
279 lanolin paste infused with IAA, PIN1b epidermal accumulation increased during the  
280 initiation of the resultant primordia (Figure 4 – supplement 3) (4 of 6 samples from 2  
281 independent transgenic events). Thus, in the absence of AtPIN1, PIN1b accumulation  
282 in the epidermis is still auxin responsive and capable polar localization in *pin1-613*  
283 meristem epidermal tissue, but it is not able to mediate organ initiation itself. These  
284 results demonstrate that when expressed in *Arabidopsis*, there is a clear functional  
285 separation between SoPIN1 and PIN1b independent of transcriptional control.

286

## 287 **SoPIN1 and PIN1b show different behaviors when expressed in the** 288 **meristem epidermis**

289 Epidermal-specific AtPIN1 expression is sufficient to rescue organ initiation in *atpin1*  
290 mutants (Bilsborough et al., 2011). In order to drive increased PIN1b expression in the  
291 epidermis, and to help reduce transgene position-effect variation of expression level,  
292 we utilized a two-component expression system in the Landsberg *erecta* (*Ler*)  
293 background to drive SoPIN1 and PIN1b under the control of the epidermis-enriched  
294 Arabidopsis ML1 promoter (Hereafter designated *proAtML1>>*) (Lenhard, 2003;  
295 Sessions et al., 2002). Under the control of *proAtML1* we achieved consistently high  
296 epidermal expression of both SoPIN1 and PIN1b, but similar to the *proAtPIN1* driven  
297 localization described above, only SoPIN1 showed clear convergent polarization  
298 patterns around the sites of organ initiation (Figure 5A-5D, Figure 5 supplement 1 and  
299 2) (9 of 9 meristems). Despite consistently high epidermal expression with this system,  
300 PIN1b polarity remained difficult to determine, and in many cells the abundance of  
301 protein on the membrane remained low (Figure 5D) (10 of 10 meristems). Instead,  
302 PIN1b accumulated in intracellular bodies, especially in the cells of the apical dome  
303 and the central domain of initiating organs (Figure 5B, 5D arrow). PIN1b abundance  
304 and polarity was highest at the boundaries of lateral organs (Figure 5 - supplement 2).  
305 Thus SoPIN1 and PIN1b show consistent behaviors in the meristem epidermis when  
306 expressed under either *proAtPIN1* or *proAtML1*. Despite increased PIN1b expression  
307 under *proAtML1*, and a resulting increase in protein accumulation in the apex, PIN1b  
308 was still unable to form convergent polarization patterns in wildtype plants.

309

310

311

312 **Both SoPIN1 and PIN1b can rescue the Arabidopsis *pin1-4* mutation**  
313 **when expressed in the meristem epidermis**

314 In order to determine whether the increased PIN1b abundance in the meristem  
315 epidermis achieved by the *proAtML1* two-component system had functional  
316 consequences, we crossed these transgenes into *pin1-4*. The *pin1-4* allele is in the  
317 Landsberg *erecta* background and has a single P579 to L amino acid change in the  
318 second-to-last transmembrane domain of AtPIN1 (Bennett et al., 1995), but the  
319 phenotype is similarly severe to *pin1-613* (Figure 6A). Remarkably, both SoPIN1 and  
320 PIN1b driven by *proAtML1* were able to rescue the organ formation defects of *pin1-4*  
321 (Figure 6A). In contrast to the SoPIN1-mediated complementation of *pin1-613*  
322 described above, both SoPIN1 and PIN1b-complemented *pin1-4* plants made WT  
323 flowers that produced seed (Figure 6 – supplement 1). In addition, both *proAtML1*  
324 SoPIN1 and PIN1b expressing *pin1-4* lines were able to rescue bulk auxin transport  
325 in the basal internode, although PIN1b was less effective than SoPIN1 (Figure 6B).  
326 Compared to wildtype and SoPIN1-complemented plants, PIN1b-complemented *pin1-*  
327 *4* plants showed a significant increase in stem diameter (Figure 6C). Thus while both  
328 proteins can complement the *pin1-4* organ initiation phenotype, the SoPIN1 and PIN1b  
329 complemented lines have differing auxin transport properties and different plant  
330 morphologies, suggesting once again that SoPIN1 and PIN1b are not functionally  
331 identical.

332 SoPIN1-complemented *pin1-4* meristems were slightly smaller than wildtype, and in  
333 rare cases showed defects in phyllotaxy (Figure 5 – supplement 1), but the protein  
334 localization was similar to the pattern observed in the WT background, with clear  
335 convergent polarization around initiating organs (Figure 5E, 5G). In contrast,  
336 compared to the WT background, PIN1b localization in *pin1-4* was dramatically altered  
337 (Compare Figure 5B with Figure 5F). Most obvious was an increase in membrane  
338 targeted PIN1b and a corresponding reduction in intracellular PIN1b (Figure 5H).  
339 PIN1b polarity in the *pin1-4* background was more apparent than in wildtype, and  
340 convergent polarization patterns clearly marked incipient organs (Figure 5H). PIN1b-  
341 complemented meristems accumulated less PIN protein in the apical dome compared  
342 to SoPIN1-complemented meristems, and the meristems were larger (Figure 5 –  
343 supplement 2).

344 In the basal internode, both PINs had similar accumulation patterns in the outer few  
345 cell layers (Figure 5I-J arrows), and both showed basal polarization in the epidermis  
346 (Figure 5K-L arrows). Despite this expression domain being drastically different than  
347 the wildtype vascular-associated pattern of AtPIN1 (Bennett et al., 2006; Gälweiler et  
348 al., 1998), expression in these few cortex layers and epidermis was apparently  
349 sufficient to drive wildtype levels of rootward bulk auxin transport in *pin1-4* (Figure 6B).

350

351

352

353

354



## 355 Discussion

### 356 SoPIN1 and PIN1b have different functions in Brachypodium

357 During spikelet development in Brachypodium SoPIN1 forms convergent polarization  
358 patterns surrounding the sites of organ initiation and strong expression of the auxin  
359 response reporter DR5 (O'Connor et al., 2014). We provide additional evidence here  
360 that SoPIN1 polarizes towards sites of high auxin concentration by showing that a DII-  
361 Venus minimum occurs at SoPIN1 convergence points. In *sopin1* mutants the  
362 reduction of DII does not occur, suggesting that SoPIN1 functions to concentrate auxin  
363 at epidermal maxima, and similar to *Arabidopsis*, this is required for organ initiation in  
364 the inflorescence. The specificity of SoPIN1 for the outer tissues in Brachypodium  
365 provides further support for the idea that maxima formation is necessary for organ  
366 initiation, and that this is primarily mediated by convergent PIN in the meristem  
367 epidermis (Jönsson et al., 2006; Kierzkowski et al., 2013; Smith, 2006).

368 SoPIN1 clade mutants have been reported in the legume *Medicago truncatula* and in  
369 tomato (*Solanum lycopersicum*), and these mutants show pleiotropic phenotypes  
370 involving phyllotaxy, organ initiation, inflorescence branching, leaf serrations, and leaf  
371 compounding, but they do not form barren pin meristems (Martinez et al., 2016; Zhou  
372 et al., 2011). These wider morphogenetic events also involve epidermal PIN  
373 convergence points and associated auxin maxima, suggesting a general role for  
374 SoPIN1 clade members in generating such maxima (Barkoulas et al., 2008;  
375 Bilsborough et al., 2011). But the lack of barren pin-formed meristems in these mutants  
376 may suggest that different species are variably dependent on SoPIN1-generated  
377 maxima for organ initiation.

378 In contrast to *sopin1*, loss of PIN1b function has no clear organ initiation defects,  
379 despite being expressed in developing organs (O'Connor et al., 2014). Given that  
380 auxin drainage is thought necessary for proper organ size and placement (Deb et al.,  
381 2015), the lack of an organ initiation phenotype in *pin1b* is surprising. However, it is  
382 possible that PIN1a performs some of this function, and double mutants are needed  
383 to address the redundancy of PIN1a and PIN1b during organ initiation.

384 The increased internode elongation in *pin1b* mutants provides new genetic tractability  
385 to address how PINs regulate tissue growth in the shoot independent of organ  
386 initiation. Grasses contain intercalary meristems, bands of indeterminate tissue  
387 separated from the apical meristem that are responsible for internode growth after  
388 organ initiation. PIN1b expression around this meristematic tissue (Figure 1I) suggests  
389 that PIN1b may regulate growth by influencing auxin distribution in this meristem. This  
390 is consistent with evidence that loss of the ABCB1 auxin exporter in maize results in  
391 dwarfism associated with reduced activity of intercalary meristems (Knöllner et al.,  
392 2010). How PIN1b alters auxin dynamics to control internode growth will be an  
393 important direction for future research.

### 394 The properties that define PIN behavior and function

395 **Membrane accumulation.** Because of their differing phenotypes in Brachypodium,  
396 we used heterologous expression of SoPIN1 and PIN1b in *Arabidopsis* to explore the  
397 ways in which different PIN family members may have different properties post-  
398 transcription (Summarized in Figure 7). When expressed in the meristem epidermis in

399 wild-type Arabidopsis, SoPIN1 is localized to the membrane in most cells while PIN1b  
400 often accumulates internally (Compare Figure 5C and D). Thus, with the same  
401 transcriptional control different PINs can vary in the degree to which, after protein  
402 production, they accumulate at the plasma membrane. The differential membrane  
403 targeting of PIN1b and SoPIN1 is a tissue-specific phenomenon however, because  
404 unlike in the epidermis, in the basal internode both PINs accumulate at the plasma  
405 membrane (Figure 2K, 2M). The regulation of PIN plasma membrane polar targeting  
406 and endocytic recycling has been an important avenue for understanding PIN function  
407 and general membrane protein biology (Luschnig and Vert, 2014). Our results provide  
408 further evidence that at least some of the signals governing membrane accumulation  
409 are inherent in, and vary between different PIN family members.

410 **Tissue accumulation.** Under the same transcriptional control SoPIN1 and PIN1b  
411 show different tissue-level accumulation patterns in Arabidopsis. In wildtype plants  
412 *proAtPIN1*-expressed PIN1b shows less overall accumulation in the epidermis  
413 compared to SoPIN1 (Compare Figure 2C and 2D). The punctate PIN1b signal in the  
414 meristem epidermis may be PIN1b protein being actively targeted for degradation as  
415 has been shown for PIN2 in the root (Abas et al., 2006). In contrast, SoPIN1 is  
416 abundant in the epidermis and accumulates in an expanded expression domain in the  
417 sub-epidermal meristem tissues (Compare Figure 2J and 2L). Also, in the basal  
418 internode SoPIN1 accumulates in the pith tissue where AtPIN1 and PIN1b do not  
419 (Figure 2E, 2G). The presence of SoPIN1 in the pith is not easy to explain because  
420 AtPIN1 shows no protein accumulation in this tissue. It is possible however that the  
421 sub-epidermal SoPIN1 protein accumulation in the meristem persists into the mature  
422 internode.

423 In Arabidopsis, endogenous PIN family members show a degree of cross-regulation  
424 where loss-of-function mutations in one PIN family member result in ectopic  
425 accumulation of a different PIN in a compensatory pattern (Blilou et al., 2005; Paponov  
426 et al., 2005; Vieten et al., 2005). We observed similar behavior in the *pin1-613* null  
427 background where SoPIN1 and PIN1b accumulation in the meristem epidermis was  
428 increased in the absence of AtPIN1 (Figure 4 supplements 1 and 2). However, we did  
429 not observe the same cross-regulation in the *pin1-4* background where SoPIN1 and  
430 PIN1b tissue-level accumulation seemed similar between *pin1-4* mutant and wild-type  
431 meristems (Figure 5 - supplements 1 and 2). These variable tissue-level abundances,  
432 and PIN cross-regulation behaviors highlight the overall redundancy of some PIN  
433 behaviors, and further demonstrate the importance of PIN post-transcriptional  
434 regulation for controlling PIN abundance.

435 **Transport activity.** In Arabidopsis, phosphorylation of PINs by several different  
436 families of protein kinases is necessary for efficient auxin transport (Barbosa et al.,  
437 2014; Jia et al., 2016; Willige et al., 2013; Zourelidou et al., 2014). The necessity for  
438 PIN activation by phosphorylation may explain the inability of PIN1b to mediate bulk  
439 auxin transport in the basal stem of *pin1-613* plants despite being expressed,  
440 accumulating at the membrane, and being polarized rootward in this tissue (Figure  
441 4M). It is possible that in the *proAtPIN1* domain PIN1b does not interact with the  
442 appropriate activating kinase, and it is thus inactive. Indeed, a partially un-  
443 phosphorylatable form of AtPIN1 fails to complement fully the bulk auxin transport  
444 defect of *pin1-613* mutants in the basal internode (Zourelidou et al., 2014). However,  
445 when expressed using *proAtML1*, PIN1b expression in the outer tissue layers of the  
446 basal internode appears sufficient to mediate bulk auxin transport in *pin1-4* (Figure

447 6B), suggesting that PIN1b activity may be tissue dependent, perhaps because of the  
448 differing expression domains of activating kinases (Zourelidou et al., 2014). Indeed,  
449 Arabidopsis PIN4 and PIN7 are present in the *proAtML1* domain (Bennett et al., 2016),  
450 making it conceivable that these PINs are the normal targets of activating kinases in  
451 this tissue. Regardless, the behavior of PIN1b in *pin1-613* Arabidopsis provides a clear  
452 indication that even once a PIN has accumulated at the cell membrane in a tissue it  
453 may not be active.

454 **Interaction.** A particularly striking result is the ability of PIN1b to form convergent  
455 polarization patterns and mediate organ initiation in the *pin1-4* missense mutant  
456 background when it is unable to do so in the null *pin1-613* background. The strong  
457 influence of *pin1-4* on PIN1b membrane targeting and polarity in the meristem  
458 epidermis (Compare Figures 6D and 6H) suggests that PIN1b may be cooperating  
459 with a partially functional *pin1-4* protein and together they recapitulate the functions of  
460 wildtype AtPIN1. The presence of some *pin1-4* function is supported by the result that  
461 SoPIN1 complementation of the null *pin1-613* allele is partial and because of flower  
462 defects the plants are sterile (Figure 3B, 3C), while complementation of *pin1-4* is  
463 complete and flowers are phenotypically normal and set seed (Figure 6 - supplement  
464 1). Consistent with these different complementation phenotypes, SoPIN1 convergent  
465 patterns are more evident in the presence of *pin1-4* than they are in the null *pin1-613*  
466 background (Compare 4A and 5E). If PIN1b is indeed inactive in null *pin1-613* mutants  
467 as we hypothesized above, then it is possible *pin1-4* facilitates the interaction of PIN1b  
468 with the appropriate activating kinase, and this allows PIN1b to perform organ  
469 initiation. Alternatively, *pin1-4* may provide polarity information that PIN1b lacks, and  
470 even though *pin1-4* is non-functional, it is able to target or stabilize PIN1b on the  
471 appropriate membrane to mediate convergent polarization patterns and organ  
472 initiation. However, *pin1-4* interaction with PIN1b cannot explain the ability of PIN1b  
473 to rescue bulk transport in the basal internodes of *pin1-4* mutants, because the two  
474 proteins presumably do not overlap in this tissue. In this case the necessary interaction  
475 between PIN1b and *pin1-4* may be set up early during organ initiation, and protein  
476 modifications propagated to the basal internode. Direct PIN interaction has so far  
477 never been shown, but if one PIN type can convey polarity or activity information to  
478 another through direct interaction this may be important for understanding auxin  
479 transport in tissues where multiple PINs overlap, such as in the root meristem (Blilou  
480 et al., 2005), or in *Brachypodium* where multiple PINs are present during organ  
481 initiation in the shoot (O'Connor et al., 2014).

482 **Polarity.** We previously showed that the polarization dynamics of SoPIN1, PIN1a, and  
483 PIN1b in *Brachypodium* could be modeled by assigning two different polarization  
484 modes to the SoPIN1 and PIN1 clades (O'Connor et al., 2014). In the model, SoPIN1  
485 orients toward the adjacent cell with the highest auxin concentration, thus transporting  
486 auxin up the concentration gradient and providing a positive feedback to concentrate  
487 auxin into local maxima. In contrast, in the model PIN1a and PIN1b proteins are  
488 allocated in proportion to auxin flux, thus providing a positive feedback where flux  
489 through the tissue is amplified by the allocation of PIN1a/b in the direction of that flux.  
490 The assignment of two different polarization modes was previously used to describe  
491 the behavior of AtPIN1 during organ placement and vein patterning utilizing an auxin-  
492 concentration based switching mechanism between the up-the-gradient (UTG) and  
493 with-the-flux (WTF) polarization modes (Bayer et al., 2009). However, it has also been  
494 suggested that a flux-based mechanism alone can account for both convergence  
495 points and vein patterning (Abley et al., 2016; Stoma et al., 2008).

496 There are still no known mechanisms for direct sensing of intercellular auxin gradients  
497 or flux across membranes, but the *sopin1* and *pin1b* phenotypes in *Brachypodium* are  
498 consistent with the different polarization modes. SoPIN1 is required for organ initiation  
499 and the formation of auxin maxima in *Brachypodium*, which is primarily modeled using  
500 UTG polarization (Bayer et al., 2009; Jönsson et al., 2006; Smith, 2006). On the other  
501 hand, *pin1b* mutant plants do not show organ initiation defects, but rather only have  
502 internode elongation defects, a tissue where WTF models have been used to explain  
503 PIN dynamics and measured auxin transport kinetics during vein patterning and the  
504 regulation of branch outgrowth (Bayer et al., 2009; Bennett et al., 2016; Mitchison,  
505 1980; Mitchison et al., 1981; Prusinkiewicz et al., 2009).

506 In wild-type *Brachypodium* the SoPIN1 and PIN1b expression domains are almost  
507 entirely mutually exclusive (O'Connor et al., 2014), making it possible that the  
508 observed polarization differences between the two clades are due to expression  
509 context and not functional differences between the proteins themselves. More  
510 specifically, perhaps an UTG mechanism dominates the epidermis while a WTF  
511 mechanism is utilized in the internal tissues, and different PINs interact equally with  
512 these context-dependent mechanisms. Our heterologous expression studies do not  
513 exclusively support context-dependent or protein-dependent mechanisms for SoPIN1  
514 and PIN1b polarity. It is clear that alone, only SoPIN1 and AtPIN1 show the convergent  
515 polarization patterns associated with UTG polarization, and alone only SoPIN1 and  
516 AtPIN1 are thus able to mediate organ initiation, while PIN1b cannot. On the other  
517 hand, all three PINs are capable of root-ward polarization in the basal internode tissue.  
518 The results presented here do not demonstrate whether within a single cell PIN1b and  
519 SoPIN1 would orient differently with respect to auxin as might be expected for the dual  
520 polarization model (O'Connor et al., 2014). However such context-independent  
521 polarization behavior was previously observed for PIN1 and PIN2 in the root where  
522 both PINs can polarize in opposing directions within a single cell type when expressed  
523 in the PIN2 domain (Kleine-Vehn et al., 2008; Wisniewska et al., 2006).

## 524 **Outlook**

525 In total, our *Brachypodium* mutant phenotypes and heterologous expression results  
526 point to multiple levels at which PIN family members can be functionally distinct.  
527 Differential membrane targeting, tissue level accumulation, transport activity, indirect  
528 or direct interaction, and the resultant polarity may all contribute to the dynamics of  
529 PIN action during plant development. In most flowering plants two PIN clades, SoPIN1  
530 and PIN1, with differing properties post-transcription mediate auxin transport in the  
531 shoot, but these properties are seemingly combined into AtPIN1 in *Arabidopsis* and  
532 other Brassicaceae species. Because PIN1b is unable to mediate organ initiation while  
533 AtPIN1 can, and these two PINs are both members of the same clade, AtPIN1 may  
534 have gained the ability to form convergent polarization patterns and mediate organ  
535 initiation after, or coincident with, the loss of the SoPIN1 clade. Indeed, when  
536 comparing Brassicaceae PIN1 proteins against a broad sampling of other angiosperm  
537 PIN1 proteins, the Brassicaceae PIN1 proteins have several divergent protein  
538 domains (Figure 7 - supplement 1), suggesting possible neofunctionalization within  
539 the Brassicaceae family. Alternatively, an expansion of the PIN3,4,7 clade is also  
540 characteristic of Brassicaceae species (O'Connor et al., 2014), making it possible  
541 duplicated members of this clade buffered the loss of SoPIN1. However, there is no  
542 indication that PIN3,4,7 have a role in organ initiation in the inflorescence (Guenot et  
543 al., 2012). Regardless, we believe the combination of SoPIN1 and PIN1



544 characteristics into AtPIN1 coincident with the loss of the SoPIN1 clade represents a  
545 form of reverse-subfunctionalization, the combination of functions originally split  
546 between homologs into a single protein after gene loss. It is not surprising that PINs  
547 may be particularly amenable to this kind of functional evolution because, as described  
548 above, there are several post-transcriptional regulatory steps that ultimately combine  
549 to control PIN function in plants. The output of auxin transport is the sum of a vast  
550 network of post-transcriptional interactions that all act to regulate auxin transport itself,  
551 and this gives the system plasticity during development, and perhaps also over  
552 evolutionary time.

553

## 554 **Materials and Methods**

### 555 ***sopin1-1* and *pin1b-1* creation with CRISPR**

556 SoPIN1 (Bradi4g26300) and PIN1b (Bradi3g59520) were targeted with CRISPR using  
557 vectors developed for rice (Miao et al., 2013). CRISPR constructs were transformed  
558 into *Brachypodium* inbred line Bd21-3 using previously published methods (Bragg et  
559 al., 2015).

#### 560 *sopin1-1* CRISPR

561 The SoPIN1 guide was AGGCTGTCGTACGAGGAGT. This guide was shorter than  
562 the typical 20bp in an effort to provide greater target specificity for SoPIN1 (Fu et al.,  
563 2014). In the T0 regenerated plants, 5 out of 9 independent transgenic events showed  
564 severe organ initiation defects, and all 5 contained lesions in the SoPIN1 CRISPR  
565 target site. Unfortunately, only one of the events with a T0 phenotype set seed. In the  
566 T1 progeny of this event only those individuals that contained the CRISPR transgene  
567 showed lesions in the SoPIN1 CRISPR target site, and these plants showed the  
568 *sopin1* phenotype and thus failed to set seed, suggesting active editing by the SoPIN1  
569 CRISPR transgene in this event.

570 Not all events showed such efficient editing however, and we identified an independent  
571 T1 family where a C insertion in the SoPIN1 CRISPR target site co-segregated with  
572 the barren inflorescence phenotype. We designated this allele, which causes a  
573 premature stop codon before the end of the third exon codon 739 base pairs  
574 downstream from the target site, *sopin1-1*. We backcrossed a heterozygous *sopin1-1*  
575 plant to the Bd21-3 parental line and all F1 progeny (N=4) were wild type. In the F2  
576 generation, the *sopin1-1* lesion co-segregated with the barren inflorescence  
577 phenotype (N=60: 32 het, 18 homo, 10 wt). Amongst these plants, 16 did not have the  
578 Cas9 transgene, and the barren inflorescence phenotype still co-segregated with the  
579 *sopin1-1* lesion (N=16: 8 het, 3 homo, 5 wt). We crossed the T1 *sopin1-1* heterozygous  
580 plant with a line homozygous for the SoPIN1-Citrine genomic reporter line (O'Connor  
581 et al., 2014). In the F2 we identified families homozygous for *sopin1-1* but segregating  
582 for the SoPIN1-Citrine transgene. Only individuals that lacked the SoPIN1-Citrine  
583 transgene showed a *sopin1-1* phenotype, while those that contained the SoPIN1-  
584 Citrine transgene made spikelets and set seed. This complementation was  
585 independent of the presence of Cas9.

586

## 587 *pin1b-1* CRISPR

588 The PIN1b guide was AGGGCAAGTACCAGATCC. We identified a single plant from  
589 the regenerating T0 PIN1b CRISPR population that had longer basal internodes and  
590 twisted leaves. This plant was homozygous for an A deletion in the PIN1b CRISPR  
591 target site causing a premature stop in the second exon 502 base pairs downstream,  
592 here designated *pin1b-1*. All T1 progeny showed the *pin1b* phenotype and were  
593 homozygous for the *pin1b-1* lesion. We backcrossed these T1 plants to Bd21-3 and  
594 all F1 progeny had a wild-type phenotype (N=11). In the F2, the *pin1b* phenotype co-  
595 segregated with the *pin1b-1* lesion (N= 215, 91 het, 39 homo, 26 wt). Amongst these  
596 plants, 24 did not have the Cas9 transgene, and the *pin1b* phenotype co-segregated  
597 perfectly with the *pin1b-1* lesion (N=24: 10 het, 6 homo, 8 wt).

## 598 Reporter Constructs

599 All constructs were cloned using Multi-site Gateway (Invitrogen). For pZmUbi::DII-  
600 Venus, we first cloned the maize ubiquitin promoter into pDONR P4-P1R (Primer IDs  
601 1-2 Table 1) and this was subsequently recombined with pDONR 221 containing  
602 Arabidopsis DII and pDONR P2R-P3 containing VENUS-N7 (Brunoud et al., 2012)  
603 into the Multi-site Gateway binary vector pH7m34GW (<http://gateway.psb.ugent.be/>).  
604 This construct was then transformed into Brachypodium Bd21-3 using previously  
605 published methods (Bragg et al., 2015). In the T3 generation, degradation of DII-Venus  
606 in the presence of auxin was validated by treating excised Brachypodium spikelet  
607 meristems with 1  $\mu$ M 1-naphthaleneacetic acid (NAA) or mock treatment in 70%  
608 ethanol, and imaging every 30 min (Figure 1 – figure supplement 2).

609 For *proAtPIN1* complementation, a 3.5kb Arabidopsis PIN1 promoter region was  
610 amplified from a genomic clone previously reported to complement the *pin1* (Heisler  
611 et al., 2005) and cloned into Gateway vector pDONR P4-P1R (Primer IDs 3-4 Table  
612 1). For each Brachypodium PIN-Citrine fusion construct the entire coding region,  
613 including the Citrine insertion, was amplified from the previously published reporter  
614 constructs (O'Connor et al., 2014) and cloned into pENTR /D-TOPO (Primer IDs 5-8  
615 Table 1). The *proAtPIN1* pDONR P4-P1R and PIN coding region vectors were then  
616 recombined into Gateway binary vector pH7m24GW (<http://gateway.psb.ugent.be/>)  
617 and transformed by floral dip into both Col-0 and plants heterozygous for *pin1-613*  
618 (also known as *pin1-7*, SALK\_047613) (Bennett et al., 2006; Smith, 2006).  
619 Complementation was assessed in the T3 generation, and all plants were genotyped  
620 for both the *pin1-613* mutation (Primer IDs 9-11 Table 1) and for presence of the PIN  
621 transgene (Primer IDs 12-14 Table 1).

622 For the *proAtML1* lines the PIN coding regions with Citrine insertion pENTR /D-TOPO  
623 Gateway vectors were recombined downstream of the two-component OP promoter  
624 in vector pMoA34-OP (Moore et al., 1998) and then transformed into the *proAtML1*  
625 driver line in the Landsberg *erecta* background (Lenhard, 2003). Lines homozygous  
626 for both the *proAtML1* driver and OP::PIN were crossed to het *pin1-4* and  
627 complementation was assessed in the F2 and F3 generations. All complemented  
628 plants were genotyped for *pin1-4* (Primer IDs 15-16 Table 1 with Acil digestion), the  
629 Brachypodium PINs (Primer IDs 12-14 Table 1), and the presence of the ML1 driver  
630 transgene (Primer IDs 17-18 Table 1).

631

## 632 **Confocal Imaging**

633 All confocal images were captured on a Zeiss 780 laser scanning confocal using  
634 514nm excitation. Detection wavelengths: 517-570nm for Citrine tagged PINs, 631-  
635 717nm for Propidium Iodide, and 646-726 for chlorophyll A auto-fluorescence. The  
636 pinhole was set to 1 airy unit for all meristem stacks and details of sub-epidermal  
637 polarization, but was open to the maximum setting for tiled longitudinal and cross  
638 sections of the basal internode (Figures 2C-H, 4C-H and 5I-J). Detection gain and  
639 laser power were varied according to signal strength unless direct comparisons  
640 between genotypes were made as indicated in figure legends.

## 641 **Auxin Transport Assays**

642 Auxin transport assays were carried out as described in (Crawford et al., 2010). Briefly,  
643 17 mm long basal internodes were excised and the apical end submerged in 30  $\mu$ l  
644 Arabidopsis salts (ATS) without sucrose (pH = 5.6) containing 1  $\mu$ M  $^{14}$ C-IAA (American  
645 Radiolabeled Chemicals). After 6 hours incubation, the basal 5 mm segment was  
646 excised, cut in half, and shaken overnight at 400 RPM in 200  $\mu$ l scintillation liquid prior  
647 to scintillation counting. 10 $\mu$ M N-1-Naphthylphthalamic Acid (NPA), an auxin transport  
648 inhibitor, was added prior to incubation for negative controls.

649

## 650 **Acknowledgments**

651 Thanks to Fabrizio Ticchiarelli for genotyping help, Martin van Rongen for assistance  
652 with transport assays and *pin1-613* oligos, Tom Bennett for *proAtPIN1* oligos, Marcus  
653 Heisler for AtPIN1-GFP construct and *pin1-4* genotyping assistance, Teva Vernoux  
654 for DII plasmids, and to all the members of the Leyser lab. Thanks also to Graeme  
655 Mitchison and Katie Abley for helpful comments on the manuscript.

656

## 657 **References**

658 **Abas, L., Benjamins, R., Malenica, N., Paciorek, T., Wisniewska, J.,**  
659 **Wirniewska, J., Moulinier-Anzola, J. C., Sieberer, T., Friml, J. and**  
660 **Luschnig, C. (2006).** Intracellular trafficking and proteolysis of the  
661 Arabidopsis auxin-efflux facilitator PIN2 are involved in root gravitropism.  
662 *Nat Cell Biol* **8**, 249–256.

663 **Abley, K., Marée, A. F. and Coen, E. (2016).** Formation of polarity  
664 convergences underlying shoot outgrowths. *eLife* **5**, 2061.

665 **Adamowski, M. and Friml, J. (2015).** PIN-Dependent Auxin Transport: Action,  
666 Regulation, and Evolution. *The Plant Cell* **27**, 20–32.

667 **Barbosa, I. C. R., Zourelidou, M., Willige, B. C., Weller, B. and**  
668 **Schwechheimer, C. (2014).** D6 PROTEIN KINASE activates auxin  
669 transport-dependent growth and PIN-FORMED phosphorylation at the

- 670 plasma membrane. *Dev Cell* **29**, 674–685.
- 671 **Barkoulas, M., Hay, A., Kougioumoutzi, E. and Tsiantis, M.** (2008). A  
672 developmental framework for dissected leaf formation in the Arabidopsis  
673 relative *Cardamine hirsuta*. *Nat Genet* **40**, 1136–1141.
- 674 **Bayer, E. M., Bayer, E. M., Smith, R. S., Mandel, T., Nakayama, N., Sauer,**  
675 **M., Prusinkiewicz, P. and Kuhlemeier, C.** (2009). Integration of transport-  
676 based models for phyllotaxis and midvein formation. *Genes Dev* **23**, 373–  
677 384.
- 678 **Benková, E., Michniewicz, M., Sauer, M., Teichmann, T., Seifertová, D.,**  
679 **Jürgens, G. and Friml, J.** (2003). Local, Efflux-Dependent Auxin Gradients  
680 as a Common Module for Plant Organ Formation. *Cell* **115**, 591–602.
- 681 **Bennett, S. R. M., Alvarez, J., Bossinger, G. and Smyth, D. R.** (1995).  
682 Morphogenesis in pinoid mutants of *Arabidopsis thaliana*. *Plant J* **8**, 505–  
683 520.
- 684 **Bennett, T. A., Hines, G., van Rongen, M., Waldie, T., Sawchuk, M. G.,**  
685 **Scarpella, E., Ljung, K. and Leyser, H. M. O.** (2016). Connective Auxin  
686 Transport in the Shoot Facilitates Communication between Shoot Apices.  
687 *PLoS Biol* **14**, e1002446.
- 688 **Bennett, T. A., Sieberer, T., Willett, B., Booker, J., Luschnig, C. and Leyser,**  
689 **H. M. O.** (2006). The Arabidopsis MAX Pathway Controls Shoot Branching  
690 by Regulating Auxin Transport. *Current Biology* **16**, 553–563.
- 691 **Bilsborough, G. D., Runions, A., Barkoulas, M., Jenkins, H. W., Hasson,**  
692 **A., Galinha, C., Laufs, P., Hay, A., Prusinkiewicz, P. and Tsiantis, M.**  
693 (2011). Model for the regulation of *Arabidopsis thaliana* leaf margin  
694 development. *Proc Natl Acad Sci USA* **108**, 3424–3429.
- 695 **Blilou, I., Xu, J., Wildwater, M., Willemsen, V., Paponov, I., Friml, J.,**  
696 **Heidstra, R., Aida, M., Palme, K. and Scheres, B.** (2005). The PIN auxin  
697 efflux facilitator network controls growth and patterning in *Arabidopsis* roots.  
698 *Nature* **433**, 39–44.
- 699 **Bragg, J. N., Anderton, A., Nieu, R. and Vogel, J. P.** (2015). Brachypodium  
700 *distachyon*. *Methods Mol Biol* **1223**, 17–33.
- 701 **Brunoud, G., Wells, D. M., Oliva, M., Larrieu, A., Mirabet, V., Burrow, A. H.,**  
702 **Beeckman, T., Kepinski, S., Traas, J., Bennett, M. J., et al.** (2012). A  
703 novel sensor to map auxin response and distribution at high spatio-temporal  
704 resolution. *Nature* **482**, 103–106.
- 705 **Crawford, S., Shinohara, N., Sieberer, T., Williamson, L., George, G.,**  
706 **Hepworth, J., Muller, D., Domagalska, M. A. and Leyser, H. M. O.** (2010).



- 707 Strigolactones enhance competition between shoot branches by dampening  
708 auxin transport. *Development* **137**, 2905–2913.
- 709 **Deb, Y., Marti, D., Frenz, M., Kuhlemeier, C. and Reinhardt, D.** (2015).  
710 Phyllotaxis involves auxin drainage through leaf primordia. *Development*  
711 **142**, dev.121244–2001.
- 712 **Fu, Y., Sander, J. D., Reyon, D., Cascio, V. M. and Joung, J. K.** (2014).  
713 Improving CRISPR-Cas nuclease specificity using truncated guide RNAs.  
714 *Nat Biotechnol* **32**, 279–284.
- 715 **Gälweiler, L., Guan, C., Müller, A., Wisman, E., Mendgen, K., Yephremov,**  
716 **A. and Palme, K.** (1998). Regulation of Polar Auxin Transport by AtPIN1 in  
717 Arabidopsis Vascular Tissue. *Science* **282**, 2226–2230.
- 718 **Gordon, S. P., Heisler, M. G., Reddy, G. V., Ohno, C., Das, P. and**  
719 **Meyerowitz, E. M.** (2007). Pattern formation during de novo assembly of  
720 the Arabidopsis shoot meristem. *Development* **134**, 3539–3548.
- 721 **Guenot, B., Bayer, E. M., Bayer, E., Kierzkowski, D., Smith, R. S., Mandel,**  
722 **T., Zádňíková, P., Benková, E. and Kuhlemeier, C.** (2012). Pin1-  
723 independent leaf initiation in Arabidopsis. *Plant Physiol* **159**, 1501–1510.
- 724 **Habets, M. E. J. and Offringa, R.** (2014). PIN-driven polar auxin transport in  
725 plant developmental plasticity: a key target for environmental and  
726 endogenous signals. *New Phytologist* **203**, 362–377.
- 727 **Heisler, M. G., Ohno, C., Das, P., Sieber, P., Reddy, G. V., Long, J. A. and**  
728 **Meyerowitz, E. M.** (2005). Patterns of auxin transport and gene expression  
729 during primordium development revealed by live imaging of the Arabidopsis  
730 inflorescence meristem. *Curr Biol* **15**, 1899–1911.
- 731 **Jia, W., Li, B., Li, S., Liang, Y., Wu, X., Ma, M., Wang, J., Gao, J., Cai, Y.,**  
732 **Zhang, Y., et al.** (2016). Mitogen-Activated Protein Kinase Cascade MKK7-  
733 MPK6 Plays Important Roles in Plant Development and Regulates Shoot  
734 Branching by Phosphorylating PIN1 in Arabidopsis. *PLoS Biol* **14**,  
735 e1002550.
- 736 **Jönsson, H., Heisler, M. G., Shapiro, B. E., Meyerowitz, E. M. and**  
737 **Mjolsness, E.** (2006). An auxin-driven polarized transport model for  
738 phyllotaxis. *Proc Natl Acad Sci USA* **103**, 1633–1638.
- 739 **Kierzkowski, D., Lenhard, M., Smith, R. S. and Kuhlemeier, C.** (2013).  
740 Interaction between meristem tissue layers controls phyllotaxis. *Dev Cell* **26**,  
741 616–628.
- 742 **Kleine-Vehn, J., Dhonukshe, P., Sauer, M., Brewer, P. B., Wisniewska, J.,**  
743 **Paciorek, T., Benková, E. and Friml, J.** (2008). ARF GEF-dependent

- 744 transcytosis and polar delivery of PIN auxin carriers in Arabidopsis. *Curr Biol*  
745 **18**, 526–531.
- 746 **Knöller, A. S., Blakeslee, J. J., Richards, E. L., Peer, W. A. and Murphy, A.**  
747 **S.** (2010). Brachytic2/ZmABCB1 functions in IAA export from intercalary  
748 meristems. *J Exp Bot* **61**, 3689–3696.
- 749 **Lenhard, M.** (2003). Stem cell homeostasis in the Arabidopsis shoot meristem  
750 is regulated by intercellular movement of CLAVATA3 and its sequestration  
751 by CLAVATA1. *Development* **130**, 3163–3173.
- 752 **Leyser, H. M. O.** (2005). Auxin Distribution and Plant Pattern Formation: How  
753 Many Angels Can Dance on the Point of PIN? *Cell* **121**, 819–822.
- 754 **Leyser, H. M. O.** (2006). Dynamic integration of auxin transport and signalling.  
755 *CURBIO* **16**, R424–33.
- 756 **Leyser, H. M. O.** (2010). The power of auxin in plants. *Plant Physiol* **154**, 501–  
757 505.
- 758 **Luschig, C. and Vert, G.** (2014). The dynamics of plant plasma membrane  
759 proteins: PINs and beyond. *Development* **141**, 2924–2938.
- 760 **Martinez, C. C., Koenig, D., Chitwood, D. H. and Sinha, N. R.** (2016). A sister  
761 of PIN1 gene in tomato (*Solanum lycopersicum*) defines leaf and flower  
762 organ initiation patterns by maintaining epidermal auxin flux. *Dev Biol* **419**,  
763 85–98.
- 764 **Miao, J., Guo, D., Zhang, J., Huang, Q., Qin, G., Zhang, X., Wan, J., Gu, H.**  
765 **and Qu, L.-J.** (2013). Targeted mutagenesis in rice using CRISPR-Cas  
766 system. *Cell Res* **23**, 1233–1236.
- 767 **Mitchison, G. J.** (1980). A Model for Vein Formation in Higher Plants. *Proc.*  
768 *Biol. Sci.* **207**, 79–109.
- 769 **Mitchison, G. J., Hanke, D. E. and Sheldrake, A. R.** (1981). The Polar  
770 Transport of Auxin and Vein Patterns in Plants [and Discussion].  
771 *Philosophical Transactions of the Royal Society B: Biological Sciences* **295**,  
772 461–471.
- 773 **Moore, I., Gälweiler, L., Grosskopf, D. and Palme, K.** (1998). A transcription  
774 activation system for regulated gene expression in transgenic plants. *Proc.*  
775 *Natl. Acad. Sci. U.S.A.* **95**, 376–381.
- 776 **O'Connor, D. L., Runions, A., Runions, A., Sluis, A., Sluis, A., Bragg, J.,**  
777 **Bragg, J., Vogel, J. P., Vogel, J. P., Prusinkiewicz, P., et al.** (2014). A  
778 division in PIN-mediated auxin patterning during organ initiation in grasses.  
779 **10**, e1003447.

- 780 **Okada, K.** (1991). Requirement of the Auxin Polar Transport System in Early  
781 Stages of Arabidopsis Floral Bud Formation. *THE PLANT CELL ONLINE* **3**,  
782 677–684.
- 783 **Paponov, I. A., Teale, W. D. and Trebar, M.** (2005). The PIN auxin efflux  
784 facilitators: evolutionary and functional perspectives. *Trends Plant Sci* **10**,  
785 170–177.
- 786 **Prusinkiewicz, P., Crawford, S., Smith, R. S., Ljung, K., Bennett, T. A.,**  
787 **Ongaro, V. and Leyser, H. M. O.** (2009). Control of bud activation by an  
788 auxin transport switch. *Proc Natl Acad Sci USA* **106**, 17431–17436.
- 789 **Raven, J. A.** (1975). Transport of indoleacetic acid in plant cells in relation to  
790 pH and electrical potential gradients, and its significance for polar IAA  
791 transport. *New Phytol* **74**, 163–172.
- 792 **Reinhardt, D., Mandel, T. and Kuhlemeier, C.** (2000). Auxin Regulates the  
793 Initiation and Radial Position of Plant Lateral Organs. *The Plant Cell* **12**, 507.
- 794 **Reinhardt, D., Pesce, E.-R., Stieger, P., Mandel, T., Baltensperger, K.,**  
795 **Bennett, M. J., Traas, J., Friml, J. and Kuhlemeier, C.** (2003). Regulation  
796 of phyllotaxis by polar auxin transport. *Nature* **426**, 255–260.
- 797 **Rubery, P. H. and Sheldrake, A. R.** (1974). Carrier-mediated auxin transport.  
798 *Planta* **118**, 101–121.
- 799 **Sawchuk, M. G., Edgar, A. and Scarpella, E.** (2013). Patterning of Leaf Vein  
800 Networks by Convergent Auxin Transport Pathways. *PLoS Genet* **9**,  
801 e1003294.
- 802 **Scarpella, E., Marcos, D., Friml, J. and Berleth, T.** (2006). Control of leaf  
803 vascular patterning by polar auxin transport. *Genes Dev* **20**, 1015–1027.
- 804 **Sessions, A., Weigel, D. and Yanofsky, M. F.** (2002). The Arabidopsis  
805 thaliana MERISTEM LAYER 1 promoter specifies epidermal expression in  
806 meristems and young primordia. *Plant J* **20**, 259–263.
- 807 **Shinohara, N., Taylor, C. and Leyser, H. M. O.** (2013). Strigolactone Can  
808 Promote or Inhibit Shoot Branching by Triggering Rapid Depletion of the  
809 Auxin Efflux Protein PIN1 from the Plasma Membrane. *PLoS Biol* **11**,  
810 e1001474.
- 811 **Smith, R. S.** (2006). A plausible model of phyllotaxis. *Proc Natl Acad Sci USA*  
812 **103**, 1301–1306.
- 813 **Stoma, S., Lucas, M., Chopard, J., Schaedel, M. and Godin, C.** (2008). Flux-  
814 Based Transport Enhancement as a Plausible Unifying Mechanism for  
815 Auxin Transport in Meristem Development. *PLoS Comput Biol* **4**, e1000207.

- 816 **Verna, C., Sawchuk, M. G., Linh, N. M. and Scarpella, E.** (2015). Control of  
817 vein network topology by auxin transport. *BMC Biol* **13**, 94.
- 818 **Vieten, A., Vanneste, S., Wisniewska, J., Benkova, E., Benjamins, R.,**  
819 **Beeckman, T., Luschnig, C. and Friml, J.** (2005). Functional redundancy  
820 of PIN proteins is accompanied by auxin-dependent cross-regulation of PIN  
821 expression. *Development* **132**, 4521–4531.
- 822 **Willige, B. C., Ahlers, S., Zourelidou, M., Barbosa, I. C. R., Demarsy, E.,**  
823 **Trevisan, M., Davis, P. A., Roelfsema, M. R. G., Hangarter, R.,**  
824 **Fankhauser, C., et al.** (2013). D6PK AGCVIII kinases are required for auxin  
825 transport and phototropic hypocotyl bending in *Arabidopsis*. *The Plant Cell*  
826 **25**, 1674–1688.
- 827 **Wisniewska, J., Xu, J., Seifertová, D., Brewer, P. B., Ruzicka, K., Blilou, I.,**  
828 **Rouquié, D., Benková, E., Scheres, B. and Friml, J.** (2006). Polar PIN  
829 localization directs auxin flow in plants. *Science* **312**, 883–883.
- 830 **Xu, J., Hofhuis, H., Heidstra, R., Sauer, M., Friml, J. and Scheres, B.** (2006).  
831 A molecular framework for plant regeneration. *Science* **311**, 385–388.
- 832 **Zhou, C., Han, L., Hou, C., Metelli, A., Qi, L., Tadege, M., Mysore, K. S. and**  
833 **Wang, Z.-Y.** (2011). Developmental analysis of a *Medicago truncatula*  
834 smooth leaf margin1 mutant reveals context-dependent effects on  
835 compound leaf development. *The Plant Cell* **23**, 2106–2124.
- 836 **Zourelidou, M., Absmanner, B., Weller, B., Barbosa, I. C. R., Willige, B. C.,**  
837 **Fastner, A., Streit, V., Port, S. A., Colcombet, J., la Fuente van Bentem,**  
838 **de, S., et al.** (2014). Auxin efflux by PIN-FORMED proteins is activated by  
839 two different protein kinases, D6 PROTEIN KINASE and PINOID. *eLife* **3**.
- 840
- 841



## 842 **Figures and Legends**

843

844 **Figure 1. SoPIN1 and PIN1b have different functions in Brachypodium. (A)**  
845 SoPIN1 (Bradi4g26300) and PIN1b (Bradi3g59520) CRISPR-derived *sopin1-1* and  
846 *pin1b-1* mutant alleles. Exons are indicated by grey boxes. Arrowheads indicate  
847 CRISPR target sites and are labeled with the type of DNA lesion (C insertion or A  
848 deletion). Both alleles have premature stop codons at the positions indicated by lines.  
849 **(B-D)** Inflorescence phenotypes of CRISPR-derived *sopin1-1* and *pin1b-1* mutants.  
850 **(B)** Wildtype (WT) (inbred line Bd21-3) Brachypodium inflorescences usually have  
851 several spikelets (s) on each inflorescence. Inset shows spikelet meristem (arrow),  
852 with several floral meristems being initiated. **(C)** *sopin1-1* plants have severe organ  
853 initiation defects in the inflorescence, and spikelets often abort (asterisk), or fail to  
854 initiate despite a clear distinction between the white node (n) and green internode (i)  
855 tissue. Inset shows two barren spikelet meristems (arrows) with organ initiation  
856 defects. **(D)** *pin1b-1* plants have normal organ initiation, but internode tissue often  
857 bends. A phenotypically normal spikelet (s) is indicated. **(E)** Medial confocal Z-section  
858 of pZmUbi::DII-Venus (DII) expression in a WT spikelet co-expressing SoPIN1 tagged  
859 with Cerulean (a CFP variant) under the native SoPIN1 promoter. Organ primordia are  
860 numbered I3, I2, I1 from youngest to oldest prior to morphogenesis, and P1, P2, P3,  
861 etc. youngest to oldest after morphogenesis. DII is normally degraded at SoPIN1  
862 convergence points in I2 and I1 primordia (asterisks). Inset shows color look-up-table  
863 for all PIN images. **(F)** Medial confocal Z-section of pZmUbi::DII-Venus expression in  
864 a *sopin1-1* spikelet meristem. DII degradation does not occur in *sopin1-1* meristems,  
865 and organs fail to initiate (arrow). Inset shows color look-up-table for DII. **(G-H)** Basal  
866 internodes are elongated in *pin1b-1* mutants compared to WT. Lines in **(G)** connect  
867 equivalent nodes in WT (left) and *pin1b-1* (right) primary stems. Axillary shoots and  
868 leaves have been removed from the main axis. **(H)** Mean internode lengths along WT  
869 (left) and *pin1b-1* (right) primary stems. Nodes are numbered from 1 starting from  
870 below the inflorescence. (n=11-12 each internode, error bars +/- standard error of the  
871 mean). **(I)** Maximum projection of PIN1b tagged with Citrine under its native promoter  
872 in a longitudinal hand-section through several immature vegetative nodes. Arrows  
873 indicate the shoot apical meristem (SAM), node (n), and internode (i) tissues. Scale  
874 bars: 1cm in **(B-D)** and **(G)**. 25µm in **(E)**, **(F)** and **(I)**.

875

876 **Figure 1 – supplement 1. Mature whole-plant phenotypes of Brachypodium**  
877 **CRISPR-derived *sopin1-1* and *pin1b-1* mutants.** Left WT (Inbred Bd21-3), middle  
878 *sopin1-1*, and right *pin1b-1*. Scale bar: 1cm.

879

880 **Figure 1 – supplement 2. DII-Venus is degraded in the presence of auxin in**  
881 **Brachypodium spikelet meristems. (A)** 1 µM NAA-treated, and **(B)** mock-treated  
882 spikelet meristems expressing pZmUbi::DII-Venus imaged every 30 min after  
883 treatment. Images from left to right, pre-treatment expression, 30 min, 60 min and 90  
884 min time-points. Scale bars: 25µm.

885

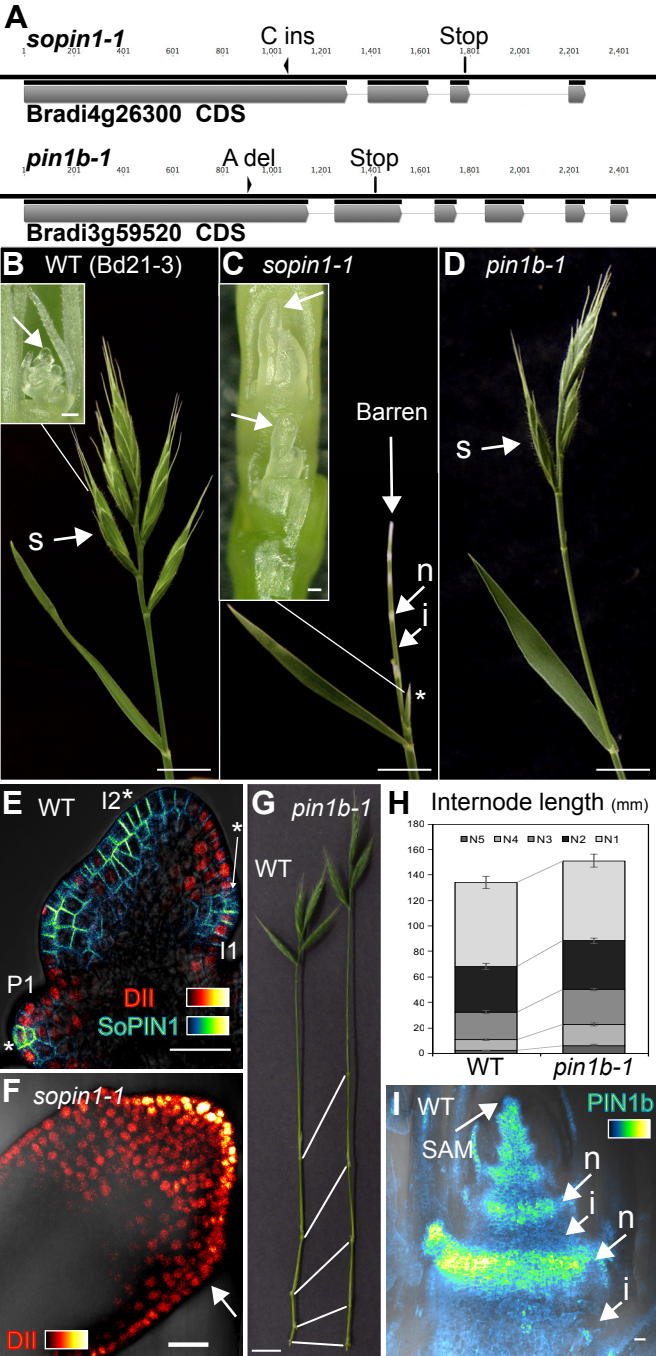

**Figure 1**

WT (Bd21-3)

*sopin1-1*

*pin1b-1*

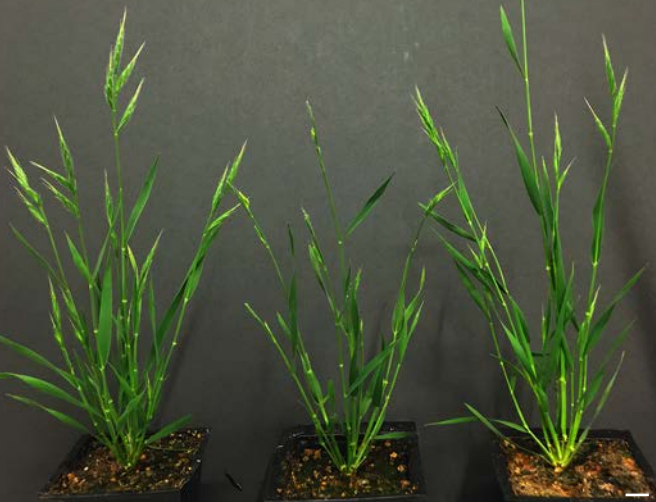

**Figure 1 - supplement 1**

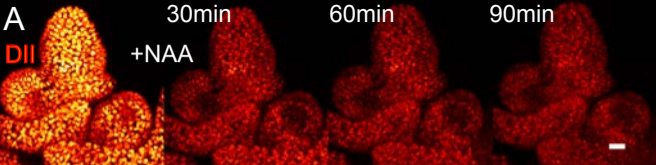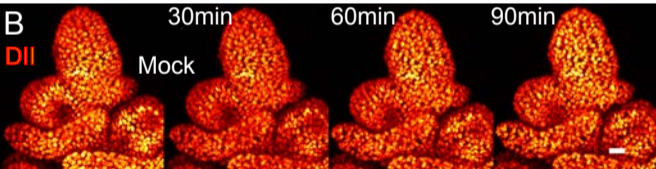

**Figure 1 - supplement 2**



886 **Figure 2. SoPIN1 and PIN1b show different behaviors when expressed in**  
887 **wildtype Arabidopsis.** Arabidopsis *AtPIN1* promoter (*proAtPIN1*) -driven expression  
888 of Citrine-tagged (a YFP derivative) SoPIN1 and PIN1b in wildtype Columbia (Col-0)  
889 Arabidopsis. **(A,C,E,G,I,J,K)** SoPIN1, **(B,D,F,H,L,M)** PIN1b. **(A-B)** Maximum  
890 projections of meristem apices. Arrow in **(A)** indicates SoPIN1 convergence point (cp)  
891 in an I2 primordium. Arrow in **(B)** indicates internalized PIN1b in punctate membrane  
892 bodies. **(C-D)** Tiled confocal maximum projections of longitudinal hand-sections  
893 through apices. Arrows indicate SoPIN1 epidermal expression in sepal primordia and  
894 flower pedicels in **(C)** and the lack of PIN1b epidermal expression in the same tissues  
895 in **(D)**. **(E-F)** Tiled confocal maximum projections of longitudinal sections through basal  
896 inflorescence stem internodes 1cm above the rosette. **(G-H)** Tiled confocal maximum  
897 projections of cross-sections through basal internodes 1cm above the rosette. Signal  
898 at the edge of each section (arrows) is cuticle auto-fluorescence. The cambium (c),  
899 xylem parenchyma (xp), and pith (p) tissues are indicated in **(E-H)**. **(I)** Maximum  
900 projection detail of SoPIN1 convergence point (Asterisk) in I2 primordia in meristem  
901 shown in **(A)**. **(J)** Confocal z-section of SoPIN1 accumulation in a ring-shaped domain  
902 just below the apex of the meristem shown in **(A)**. **(K)** Maximum projection detail of  
903 root-ward polarized SoPIN1 (arrows) in a longitudinal section of the basal internode  
904 pith tissue. **(L)** Confocal z-section of PIN1b accumulation in distinct vascular-  
905 associated domains just below the apex of the meristem shown in **(B)**. **(M)** Maximum  
906 projection detail of root-ward polarized PIN1b (arrows) in a longitudinal section of the  
907 basal internode xylem parenchyma tissue. Red signal in all panels is chlorophyll auto-  
908 fluorescence. Scale bars: 25µm in **(A-B)**, 100µm in **(C-H)**, and 25µm in **(I-M)**.  
909

*proAtPIN1::SoPIN1*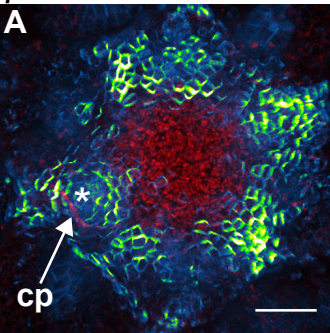*proAtPIN1::PIN1b*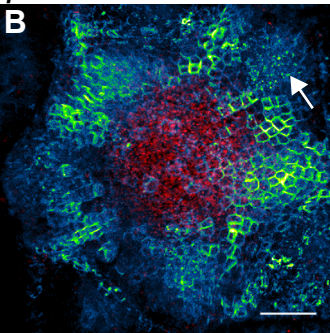*proAtPIN1::SoPIN1*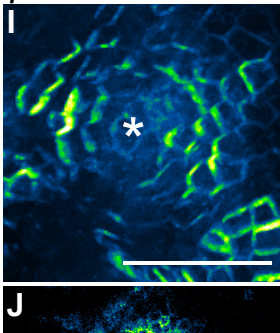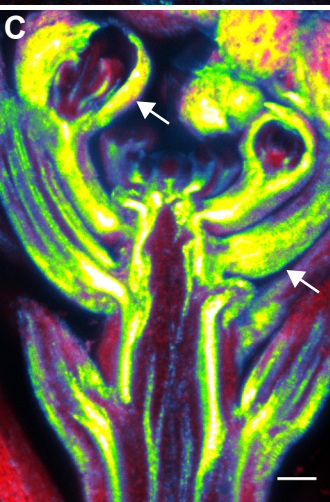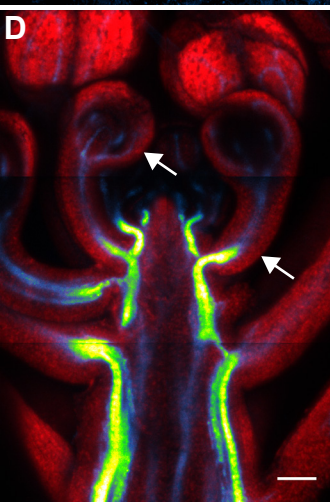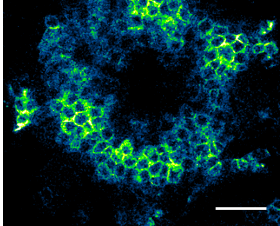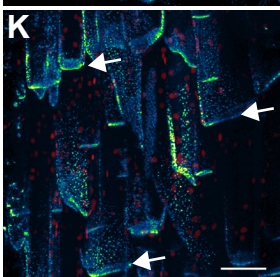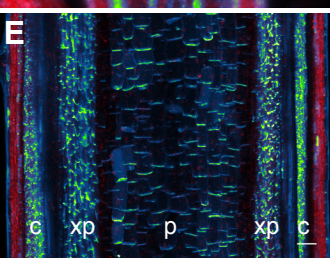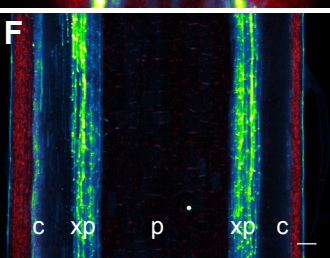*proAtPIN1::PIN1b*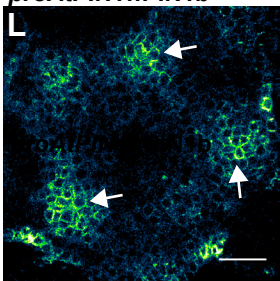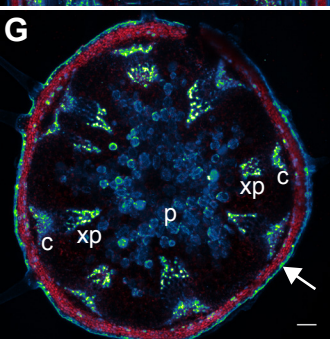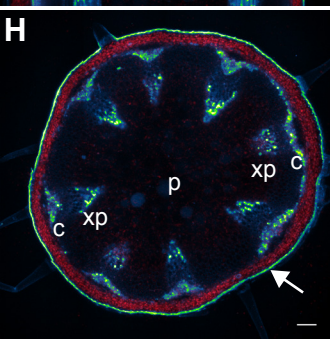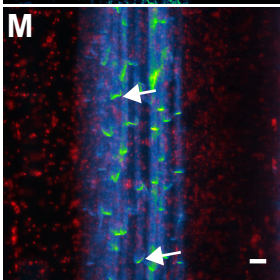

Figure 2

910 **Figure 3. SoPIN1 but not PIN1b can partially complement the Arabidopsis *pin1-***  
911 ***613* mutant organ initiation and bulk transport defects. (A)** From left to right,  
912 inflorescence phenotypes of WT (Col-0), *proAtPIN1::SoPIN1* in *pin1-613*,  
913 *proAtPIN1::PIN1b* in *pin1-613*, and *pin1-613* alone. Note that PIN1b-expressing *pin1-*  
914 *613* plants are indistinguishable from *pin1-613* alone. **(B)** Flower (left), and  
915 inflorescence apex (right) of WT (Col-0). **(C)** Flower (left), and inflorescence apex  
916 (right) of *proAtPIN1::SoPIN1* complemented *pin1-613* mutants. Note the increase in  
917 petal number in the flower, see Figure 3 - supplement 2 for organ counts. **(D)** Box-plot  
918 of bulk auxin transport (counts per minute, CPM) through basal internodes 1cm above  
919 the rosette of 40-day-old Arabidopsis inflorescence stems. (n=16 each genotype).  
920 Samples with different letters are significantly different from each other (ANOVA,  
921 Tukey HSD,  $p < 0.05$ ). Scale bars: 1cm in **(A)**, 1mm in **(B-C)**.

922

923 **Figure 3 - supplement 1. Whole-plant phenotypes of *proAtPIN1*-driven**  
924 **complementation of *pin1-613*.** From left to right, Col-0, *proAtPIN1::SoPIN1*  
925 complemented *pin1-613*, *proAtPIN1::PIN1b* expressing *pin1-613*, *pin1-613*.

926

927 **Figure 3 - supplement 2. Floral organ number in *proAtPIN1::SoPIN1***  
928 **complemented flowers.** Mean and standard-error of sepal, petal, stamen and carpel  
929 organ numbers in heterozygous *pin1-613* or wildtype (white bars), and  
930 *proAtPIN1::SoPIN1*-complemented *pin1-613* flowers (grey bars) (n=30).

931

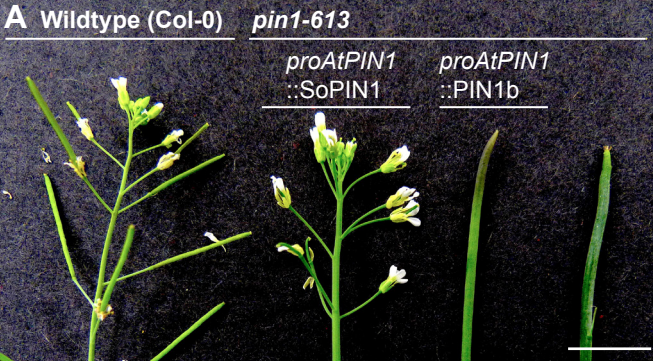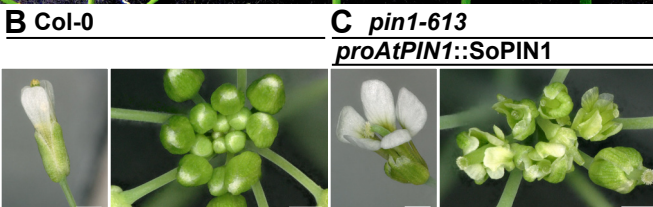

**D** Stem auxin transport

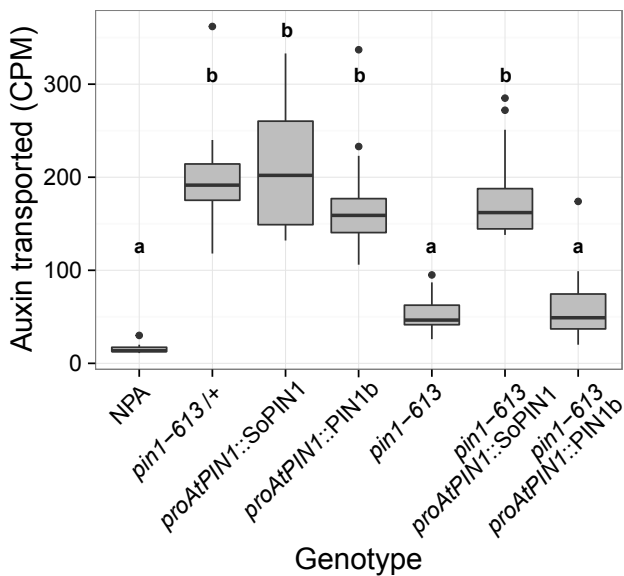

**Figure 3**



**Col-0**

***pin1-613***

*proAtPIN1*  
::*SoPIN1*

*proAtPIN1*  
::*PIN1b*

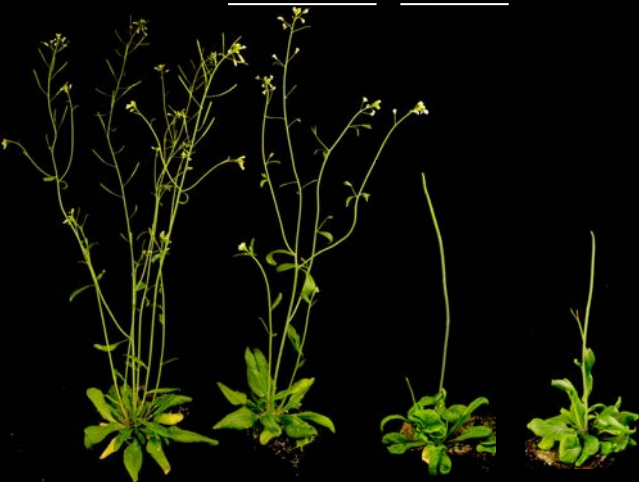

**Figure 3 - supplement 1**



## Floral organ number - *proAtPIN1::SoPIN1*

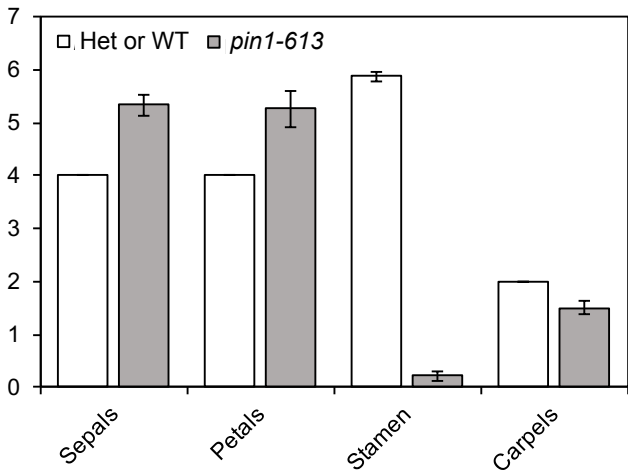

**Figure 3 - supplement 2**

932 **Figure 4. SoPIN1 but not PIN1b can mediate organ initiation and bulk transport**  
933 **in null *pin1-613* mutants.** Arabidopsis *PIN1* promoter (*proAtPIN1*) -driven expression  
934 of Citrine-tagged (YFP derivative) SoPIN1 and PIN1b in null *pin1-613* mutant tissue.  
935 **(A,C,E,G,I)** SoPIN1, **(B,D,F,H,J,K,L,M)** PIN1b. **(A-B)** Maximum projections of  
936 meristem apices. Arrow in **(B)** indicates PIN1b ring shaped epidermal domain. **(C-D)**  
937 Tiled confocal maximum projections of longitudinal hand-sections through apices.  
938 Arrow in **(D)** indicates increased PIN1b in the epidermis in the *pin1-613* background.  
939 **(E-F)** Tiled maximum projections of longitudinal sections through basal inflorescence  
940 stem internodes 1cm above the rosette. **(G-H)** Tiled maximum projections of cross-  
941 sections through basal internodes 1cm above the rosette. Signal at the edge of each  
942 section (arrows) is cuticle auto-florescence. The cambium (c), xylem parenchyma (xp),  
943 and pith (p) tissues are indicated in **(E-H)**. **(I)** Confocal z-section of SoPIN1  
944 accumulation in a ring-shaped domain just below the apex of a complemented *pin1-*  
945 *613* meristem. **(J)** Longitudinal hand-section of PIN1b just below a *pin1-613* meristem  
946 apex. Arrow shows root-ward polarized PIN1b. **(K)** Detail of polarized PIN1b in the  
947 meristem epidermis of a *pin1-613* meristem apex. **(L)** Cross-section of PIN1b in  
948 distinct bundles 2mm below a *pin1-613* meristem apex. **(M)** Root-ward polarization of  
949 PIN1b (arrow) 3-4 mm below the apex of a *pin1-613* meristem. Red signal in all panels  
950 is chlorophyll auto-florescence. Scale bars: 25µm in **(A-B)**, 100µm in **(C-H)**, and 25µm  
951 in **(I-M)**.

952

953 **Figure 4 – supplement 1. *proAtPIN1*-driven SoPIN1 expression in *pin1-613***  
954 **segregating family. (A)** *proAtPIN1::SoPIN1* expression in 6 different wt or het *pin1-*  
955 *613* meristem samples. **(B)** *proAtPIN1::SoPIN1* expression in 6 different  
956 complemented *pin1-613* meristems. All samples were imaged with identical settings  
957 to show the increase in SoPIN1 in the *pin1-613* mutant background. Red signal is  
958 chlorophyll auto-florescence. Scale bars: 25µm.

959

960 **Figure 4 – supplement 2. *proAtPIN1*-driven PIN1b expression in *pin1-613***  
961 **apexes.** Two representative meristems each from four different transgenic events. All  
962 samples were imaged with identical settings. Scale bars: 25µm.

963

964 **Figure 4 – supplement 3. *proAtPIN1*-driven PIN1b dynamics during organ**  
965 **formation induced by addition of lanolin containing 1mM IAA on *pin1-613***  
966 **apexes.** From left to right, pre-treatment, 24, 48, 72, and 96 hours after treatment.  
967 Four representative samples are shown top to bottom. Arrows indicate the lanolin  
968 paste at the 24-hour time-point. All samples were imaged with identical settings. Scale  
969 bars 25µm.

970

*proAtPIN1::SoPIN1*

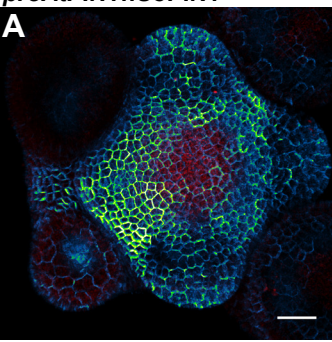

*proAtPIN1::PIN1b*

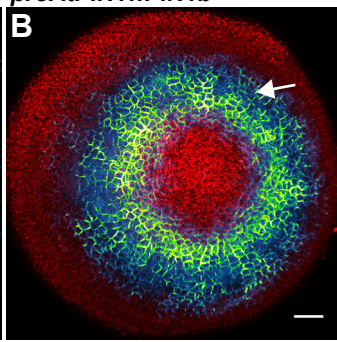

*proAtPIN1::SoPIN1*

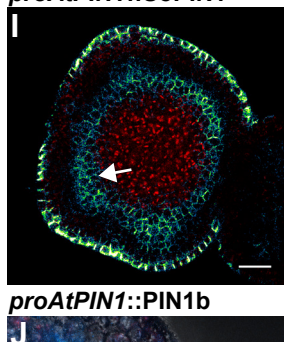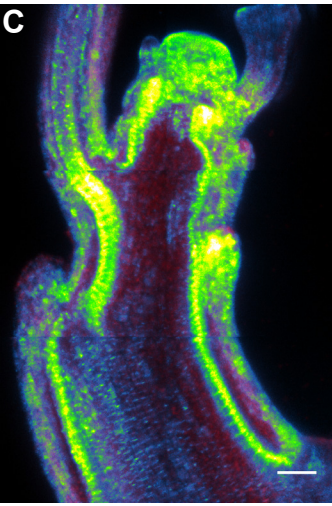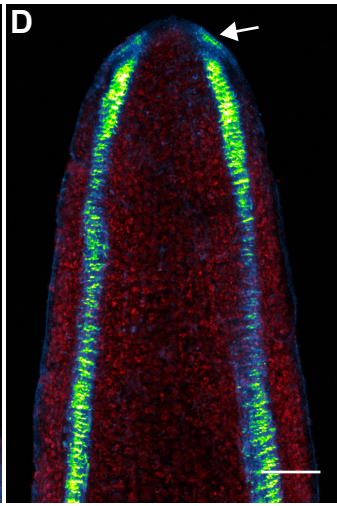

*proAtPIN1::PIN1b*

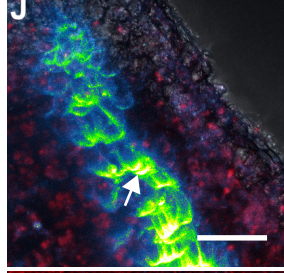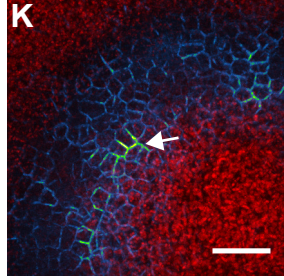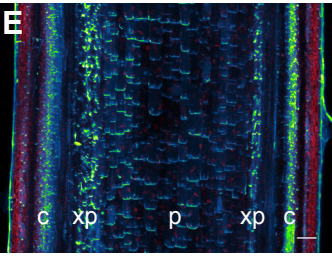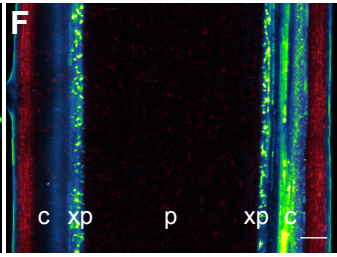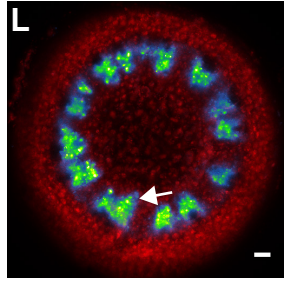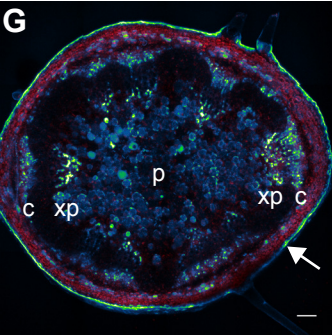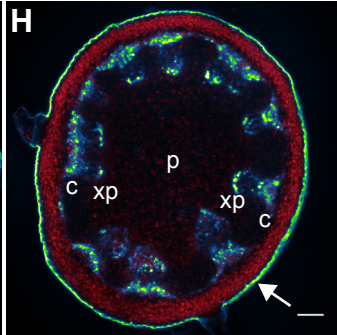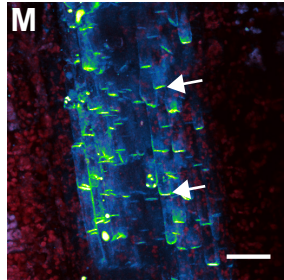

**Figure 4**



**A** *proAtPIN1::SoPIN1* WT or heterozygous

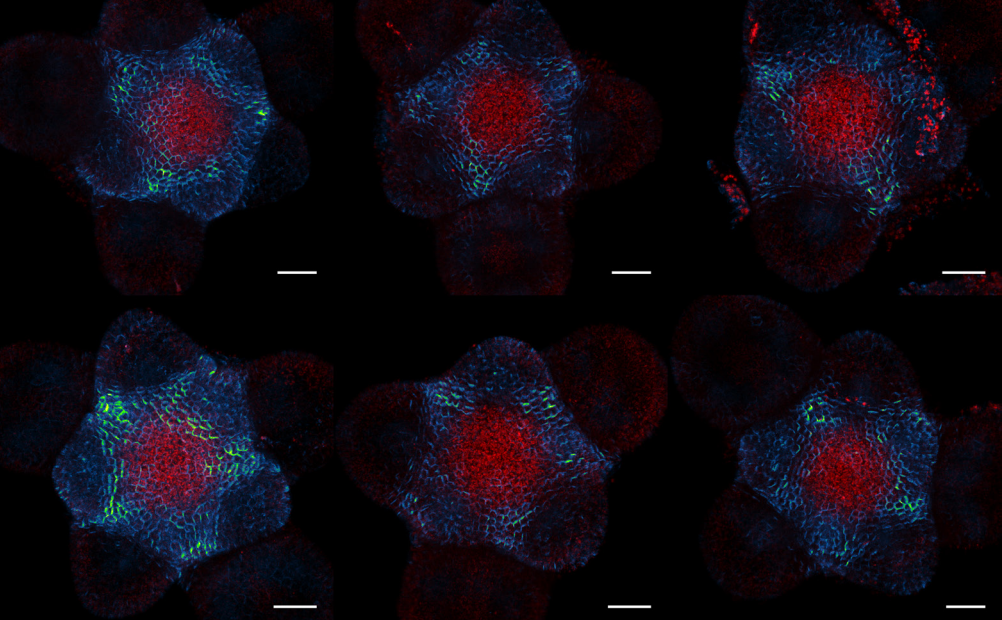

**B** *proAtPIN1::SoPIN1* complemented *pin1-613*

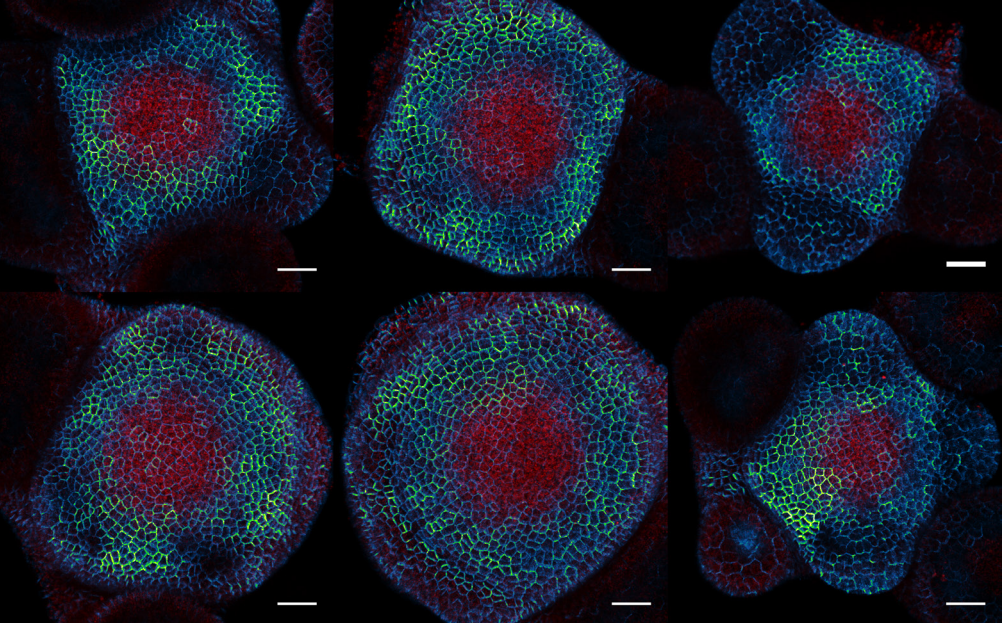

**Figure 4 - supplement 1**

*proAtPIN1::PIN1b* in *pin1-613* - Event 1

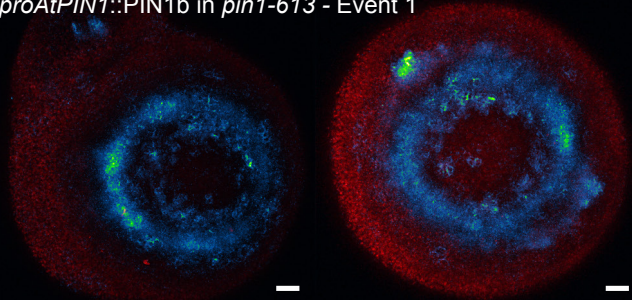

*proAtPIN1::PIN1b* in *pin1-613* - Event 2

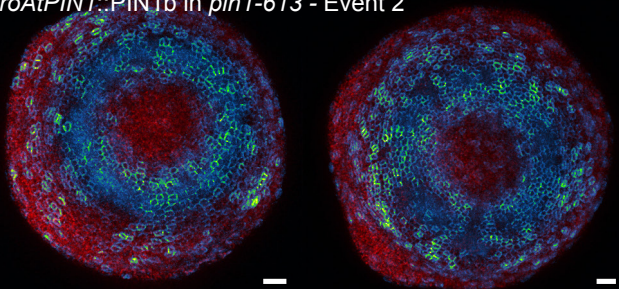

*proAtPIN1::PIN1b* in *pin1-613* - Event 3

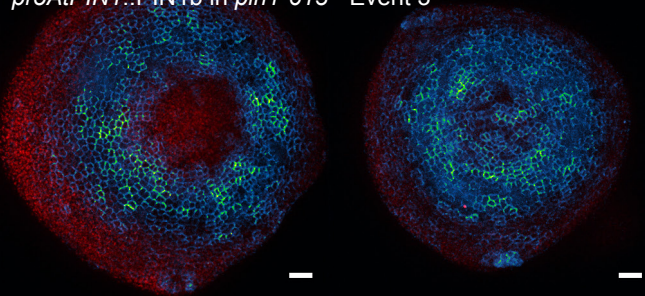

*proAtPIN1::PIN1b* in *pin1-613* - Event 4

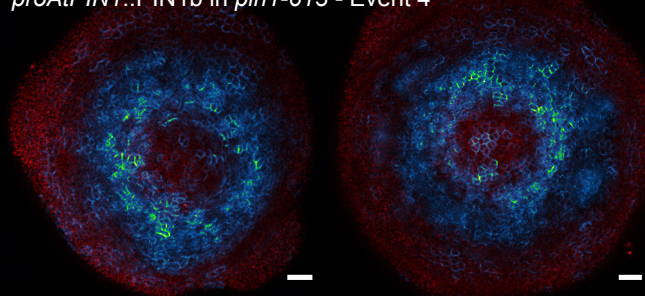

**Figure 4 - supplement 2**



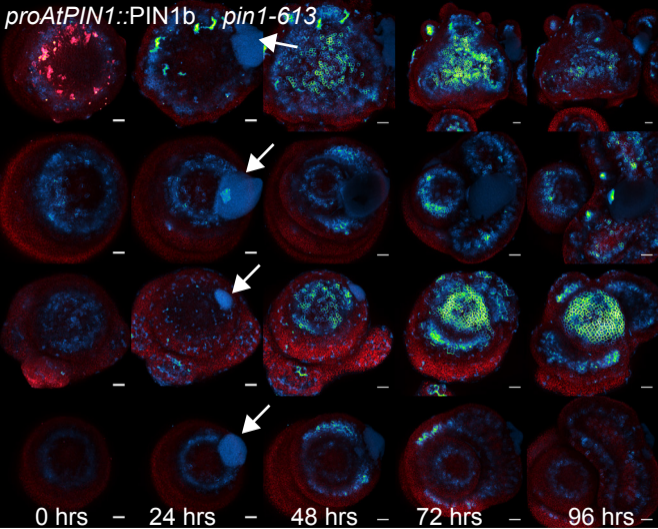

**Figure 4 - supplement 3**

971 **Figure 5. SoPIN1 and PIN1b show different behaviors under *proAtML1*-driven**  
972 **expression.** Maximum projections of *proAtML1::LhG4* driving pOP::SoPIN1 or  
973 pOP::PIN1b (*proAtML1>>SoPIN1* and *proAtML1>>PIN1b*) in wildtype Landsberg  
974 *erecta* (*Ler*) (**A-D**), and *pin1-4* (**E-L**) inflorescence meristems and basal internodes.  
975 **(A)** SoPIN1 and **(B)** PIN1b maximum projections of wildtype *Ler* inflorescence  
976 meristems. I3, I2, I1, and P1 primordia are indicated. White boxes around each I2  
977 primordium indicate the regions detailed in **(C-D)**. Asterisk in **(C)** indicates  
978 convergence point. Arrow in **(D)** indicates punctate PIN1b. **(E)** SoPIN1 and **(F)** PIN1b  
979 maximum projections of complemented *pin1-4* meristems. I3, I2, I1, and P1 primordia  
980 are indicated. White boxes around each I2 primordia indicate the regions detailed in  
981 **(G-H)**. Asterisks mark convergence points in **(G)** and **(H)**. Red signal in **(C,D,G,H)** is  
982 cell wall propidium iodide staining. **(I-J)** Tiled maximum projections of cross hand-  
983 sections of the basal internode of SoPIN1 **(I)** and PIN1b **(J)** -complemented *pin1-4*  
984 plants showing PIN signal in the outer cortex layers (arrows). Red signal in **(I-J)** is  
985 chlorophyll auto-fluorescence. **(K-L)** Epidermal maximum projections showing root-  
986 ward polarized PIN localization (arrows) in the basal internode of SoPIN1 **(K)**, and  
987 PIN1b **(L)** -complemented *pin1-4* plants. Scale bars: 25µm in **(A-H)**. 100µm in **(I-L)**.  
988

989 **Figure 5 – supplement 1. *proAtML1>>SoPIN1* representative meristem maximum**  
990 **projections.** **(A)** *proAtML1>>SoPIN1* expression in three different wildtype *Ler*  
991 meristems. **(B)** *proAtML1>>SoPIN1* expression in three different complemented *pin1-*  
992 *4* meristems. Capture settings are identical in all samples. Scale bars: 25µm.  
993

994 **Figure 5 – supplement 2. *proAtML1>>PIN1b* representative meristem maximum**  
995 **projections.** **(A)** *proAtML1>>PIN1b* expression in three different wildtype *Ler*  
996 meristems. **(B)** *proAtML1>>PIN1b* expression in three different complemented *pin1-*  
997 *4* meristems. Capture settings are identical in all samples. Scale bars: 25µm.  
998

Wildtype (Ler)

*proAtML1>>SoPIN1*

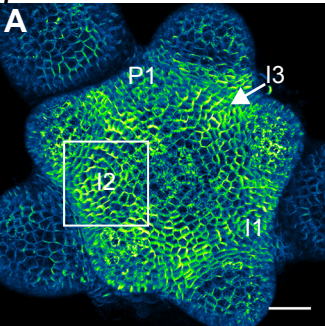

*proAtML1>>PIN1b*

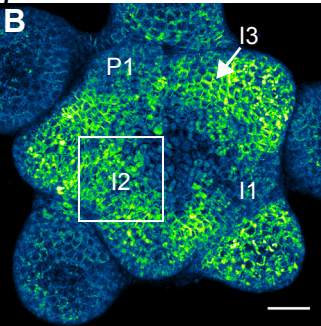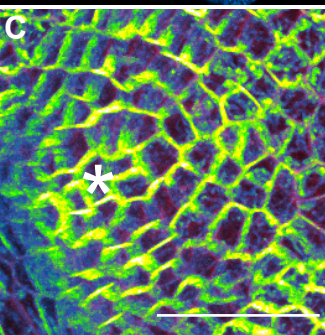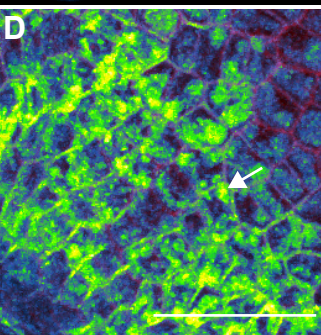

*pin1-4*

*proAtML1>>SoPIN1*

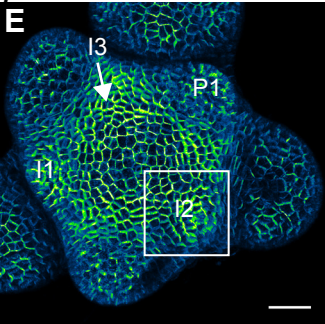

*proAtML1>>PIN1b*

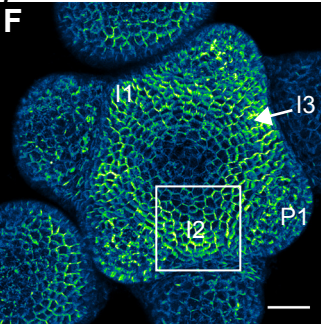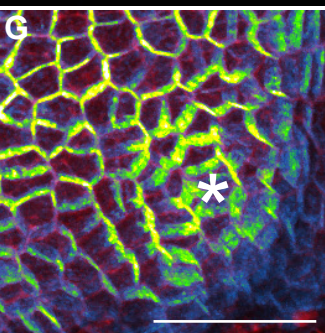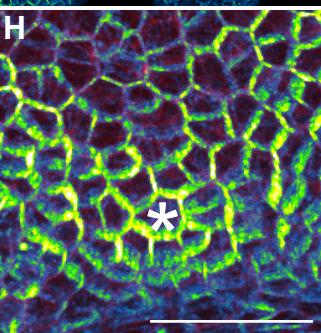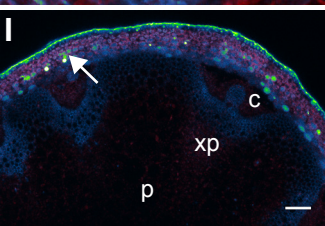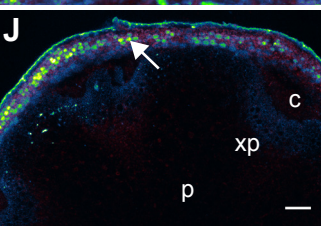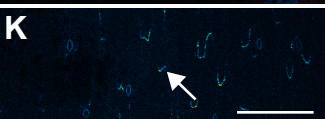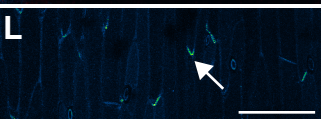

**Figure 5**



**A** *proAtML1>>SoPIN1* WT

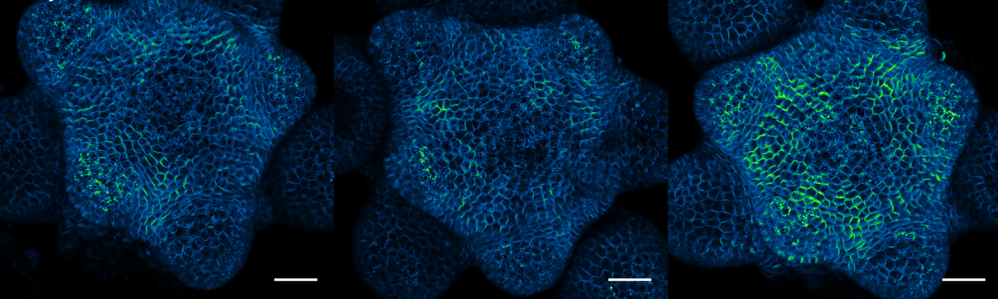

**B** *proAtML1>>SoPIN1 pin1-4*

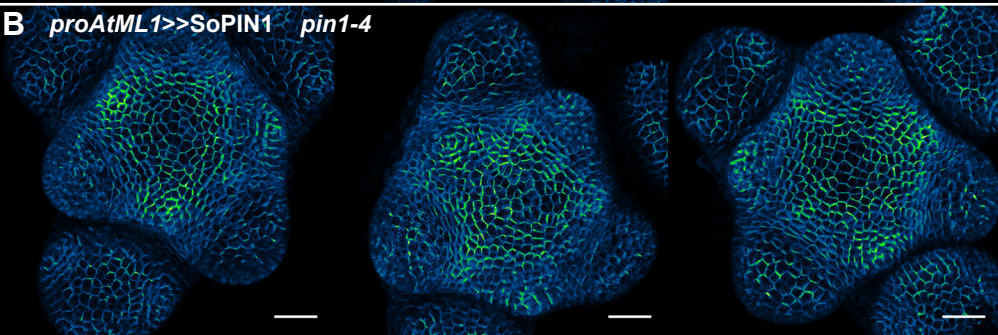

**Figure 5 - supplement 1 - *proAtML1>>SoPIN1***



**A** *proAtML1>>PIN1b* WT

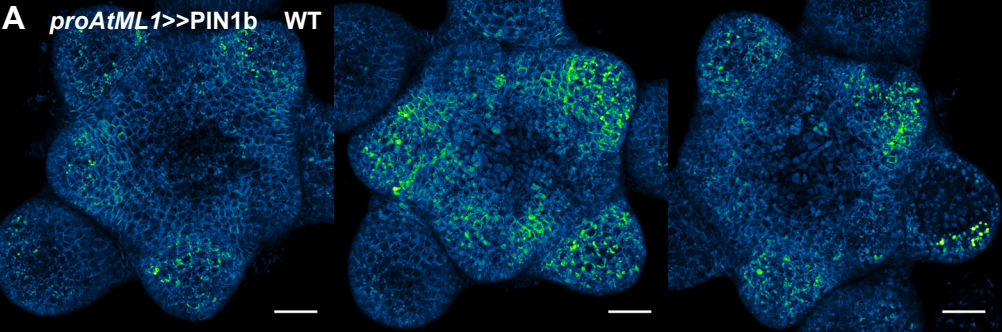

**B** *proAtML1>>PIN1b pin1-4*

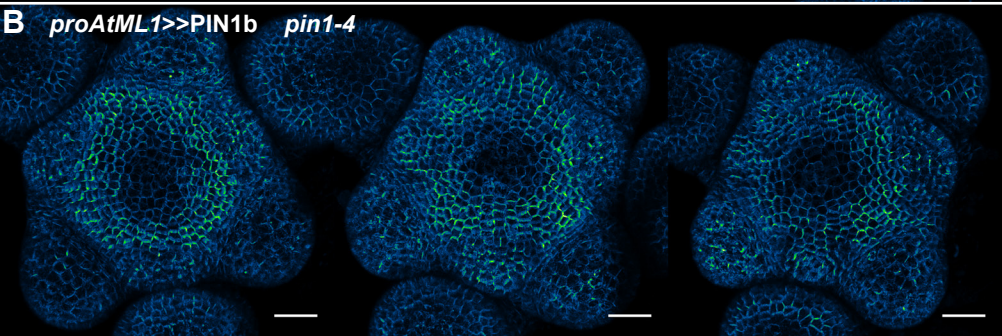

**Figure 5 - supplement 2 - *proAtML1>>PIN1b***

999 **Figure 6. Both SoPIN1 and PIN1b can complement *Arabidopsis pin1-4* under**  
1000 ***proAtML1*-driven expression. (A)** From left to right, wildtype *Ler*, *proAtML1>>*PIN1b  
1001 complemented *pin1-4*, *proAtML1>>*SoPIN1 complemented *pin1-4*, and *pin1-4* alone.  
1002 Arrow indicates barren pin inflorescence in *pin1-4*. **(B)** Box-plot of bulk auxin transport  
1003 (counts per minute, CPM) through basal internodes 1cm above the rosette of 40-day-  
1004 old *Arabidopsis* inflorescence stems (n=16 each genotype). Samples with different  
1005 letters are significantly different from each other (ANOVA, Tukey HSD, p < 0.05). **(C)**  
1006 Box-plot of stem cross-sectional area (square mm) of the basal internode 1cm above  
1007 the rosette (n=12 each genotype). Representative Toluidine Blue O stained hand  
1008 cross-sections are shown above each box. Samples with different letters are  
1009 significantly different from each other. (ANOVA, Tukey HSD, p < 0.05). *Scale bars:*  
1010 1cm in **(A)**. 500µm in **(C)**.

1011  
1012 **Figure 6 – supplement 1. *proAtML1>>* complemented *pin1-4* inflorescence**  
1013 **phenotypes. (A)** Wildtype *Ler*, **(B)** *proAtML1>>*SoPIN1 complemented *pin1-4*, and  
1014 **(C)** *proAtML1>>*PIN1b complemented *pin1-4* inflorescence apices. *Scale bars:* 1mm.  
1015

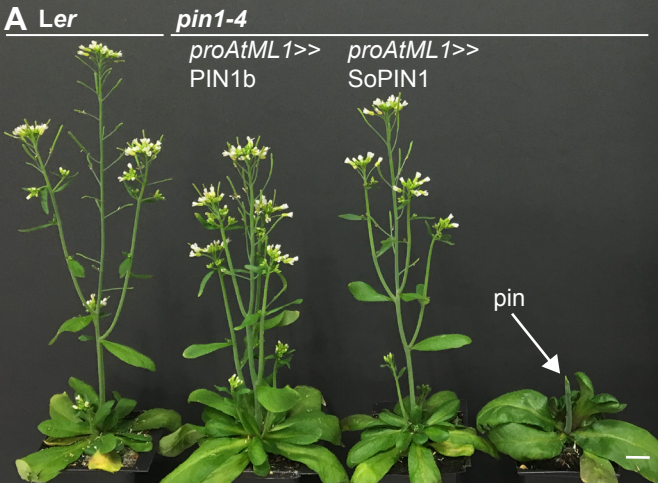

**B Stem auxin transport**

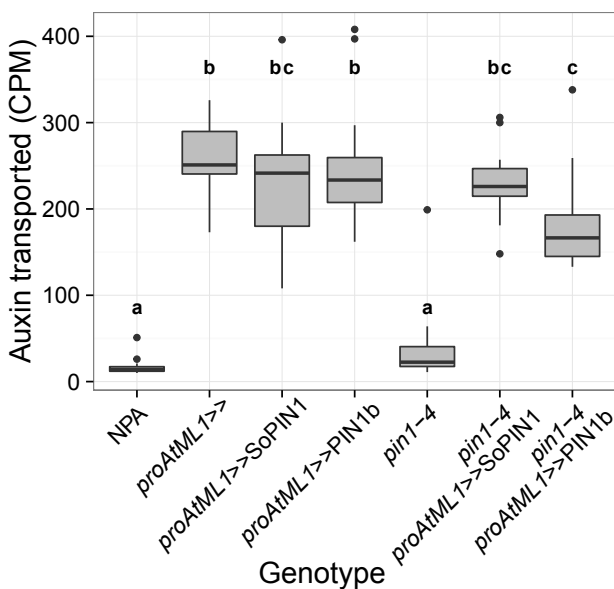

**C Stem cross-sectional area**

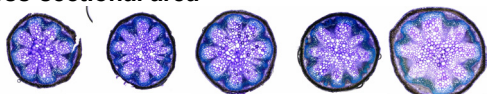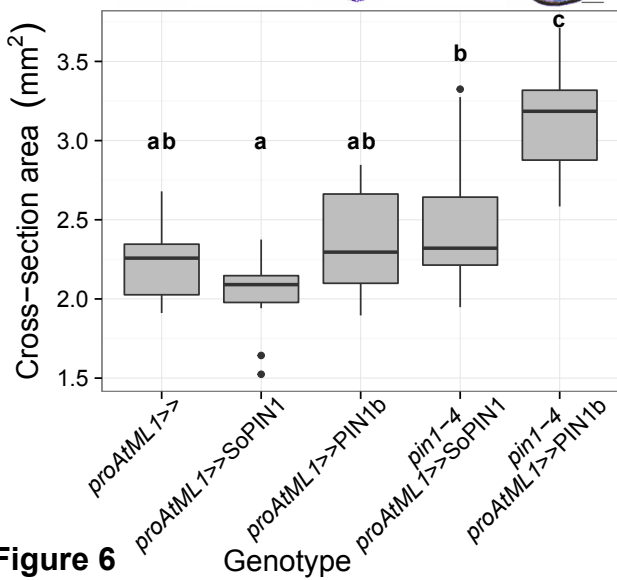

**Figure 6**

**A** *Ler*

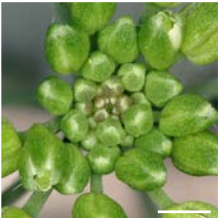

**B** *pin1-4*

*proAtML1>>SoPIN1*

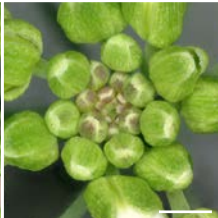

**C**

*proAtML1>>PIN1b*

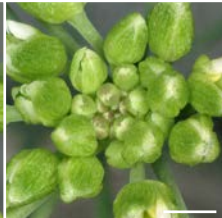

**Figure 6 - supplement 1**



1016 **Figure 7. Heterologous expression summary: Functional distinction between**  
1017 **PIN auxin efflux proteins during development.** SoPIN1 is in green, PIN1b in blue,  
1018 and the putative partially functional *pin1-4* protein is in grey. Red arrows indicate  
1019 measured auxin transport in the basal internode, while red bar-headed lines indicated  
1020 reduced transport. Black lines represent polarized PIN patterns. Convergence points  
1021 are marked with asterisks. **(A)** When expressed in both the epidermis and internal  
1022 tissues with *proAtPIN1* in wildtype Col-0, SoPIN1 forms convergent polarization  
1023 patterns in the epidermis and is partially able to rescue the organ initiation phenotypes  
1024 and bulk transport in null *pin1-613* mutants. **(B)** When SoPIN1 is expressed only in  
1025 the epidermis from the *proAtML1* promoter, it forms convergence points in the wild  
1026 type background and is able to rescue more fully the organ initiation phenotypes of  
1027 the *pin1-4* single amino acid change mutation in *Ler*. **(C)** In contrast, when PIN1b is  
1028 expressed in both the epidermis and internal tissues from the *proAtPIN1* promoter in  
1029 wildtype Col-0, it accumulates mostly in the internal tissues, and is unable to  
1030 complement the *pin1-613* organ initiation phenotype. It is also unable to transport  
1031 auxin through stem segments, despite apparently AtPIN1-like accumulation and  
1032 polarization in the stem. **(D)** When PIN1b is expressed in the epidermis from *proAtML1*  
1033 promoter, it does not form convergent polarization patterns in the wildtype *Ler*  
1034 background (blue ovals), but it does in the *pin1-4* background, where it is able to  
1035 rescue the defective organ initiation phenotype and mediate bulk transport.  
1036

1037 **Figure 7 - supplement 1. Brassicaceae-specific PIN1 domains.** **(A)** A wrapped  
1038 protein alignment showing PIN1 clade members from across the angiosperms. Grass  
1039 PIN1a proteins are indicated in grey, grass PIN1b proteins are indicated in black and  
1040 Brassicaceae PIN1 proteins are indicated in red. Domains that are unique to the  
1041 Brassicaceae family are indicated by transparent red boxes over the alignment. **(B)**  
1042 Sequenced angiosperm species and version numbers, from  
1043 <https://phytozome.jgi.doe.gov>. Species used in the alignment in **(A)** are indicated with  
1044 green circles.

1045

1046 **Table 1. Oligos.** See methods for usage.

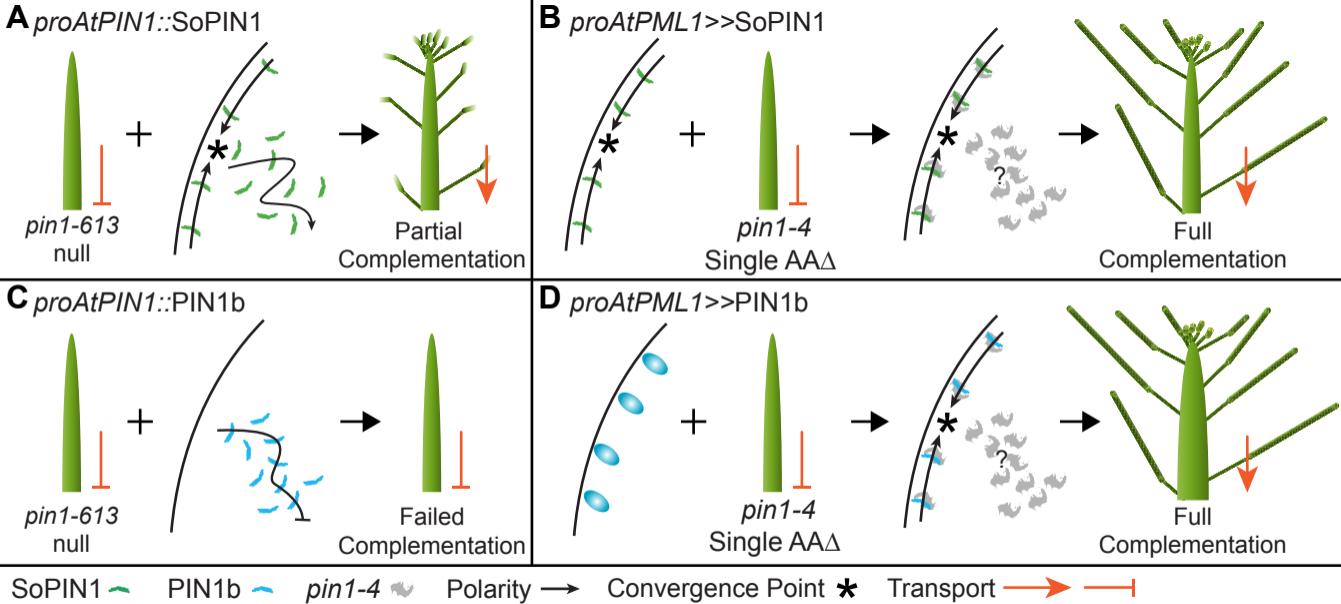

**Figure 7**



**Table 1: Primers**

| ID# | Name                               | Sequence                                           | Purpose                                     |
|-----|------------------------------------|----------------------------------------------------|---------------------------------------------|
| 1   | 019 - Ubi-1 Prom attB4 F           | GGGGACAACCTTTGTATAGAAAAGTTGCTGCAGTGCAGCGTGACCCGG   | pZmUbi amplification for cloning            |
| 2   | 020 - Ubi-1 Prom attB1 R           | GGGGACTGCTTTTTTTGTACAAACTTGCTGCAGAAGTAACACCAAACA   | pZmUbi amplification for cloning            |
| 3   | PIN1pro-GW-F                       | GGGGACAACCTTTGTATAGAAAAGTTGTTACCCTCATCCATCATTAACTT | <i>proAtPIN1</i> amplification              |
| 4   | PIN1pro-GW-R                       | GGGGACTGCTTTTTTTGTACAAACTTGTCTTTTGTTCGCCGGAGAAGAGA | <i>proAtPIN1</i> amplification              |
| 5   | 455 BdSoPIN1 cacc mRNA             | TCACATCTGCTGCCGCTGCC                               | SoPIN1-Citrine coding region amplification  |
| 6   | 302 - PIN_7 qPCR UTR R2            | AATCCCAAAGCCGCACATTG                               | SoPIN1-Citrine coding region amplification  |
| 7   | 466 BdPIN1b cacc mRNA-2            | CACCTGTACACACTGCGGCGCT                             | PIN1b-Citrine coding region amplification   |
| 8   | 308 - PIN_5 qPCR UTR R1            | ACTCGCTAACCAACCCTTAATT                             | PIN1b-Citrine coding region amplification   |
| 9   | MVR087 - pin1-613 RP (SALK_047613) | AATCATCACAGCCACTGATCC                              | <i>pin1-613</i> genotyping                  |
| 10  | MVR086 - pin1-613 LP (SALK_047613) | CAAAAACACCCCAAAATTC                                | <i>pin1-613</i> genotyping                  |
| 11  | MVR036 - LBb1.3                    | ATTTTGCCGATTCGGAAC                                 | <i>pin1-613</i> genotyping                  |
| 12  | 344 - Citrine Seq R                | GAAGCACATCAGGCCGTAG                                | PIN1b-Citrine and SoPIN1-Citrine genotyping |
| 13  | 524_Bradi4g26300_4230_F            | CGTTCGGTGTGATCCGATG                                | SoPIN1-Citrine genotyping                   |
| 14  | 541_Bradi3g59520_PIN1b_5084_F      | TGATGCTCTTCATGTTCCGAGTACC                          | PIN1b-Citrine genotyping                    |
| 15  | 543_pin1-4_Aci_F                   | GCTTTTGCGGCGGCTATGAGATTTGT                         | <i>pin1-4</i> genotyping                    |
| 16  | 544_pin1-4_Aci_R                   | GCTTCTGATTTAATTTGTGGGTTTTCA                        | <i>pin1-4</i> genotyping                    |
| 17  | 076 - BASTA_F2                     | CTTCAGCAGGTGGGTGTAGAG                              | ML1::LhG4 genotyping                        |
| 18  | 077 - BASTA_R2                     | GAGACAAGCACGGTCAACTTC                              | ML1::LhG4 genotyping                        |
